# Supplementary material for: Police officers: a high-risk group for the development of mental health disturbances? A cohort study
Source: PubMed Central journal article supplement — BMJ Open. 2013 Jan 24;3(1):e001720. doi: 10.1136/bmjopen-2012-001720 (PMC3563131; doi:10.1136/bmjopen-2012-001720), 2013-01-24
Supplement: bmjopen-2012-001720.draft_revisions.pdf [file bmjopen-2012-001720.draft_revisions.pdf]

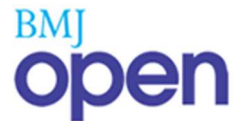

**Police officers: a high risk group for mental health disturbances? A cohort study**

|                                 |                                                                                                                                                                                                                                                                                                                                                                                                                                                                                            |
|---------------------------------|--------------------------------------------------------------------------------------------------------------------------------------------------------------------------------------------------------------------------------------------------------------------------------------------------------------------------------------------------------------------------------------------------------------------------------------------------------------------------------------------|
| Journal:                        | <i>BMJ Open</i>                                                                                                                                                                                                                                                                                                                                                                                                                                                                            |
| Manuscript ID:                  | bmjopen-2012-001720                                                                                                                                                                                                                                                                                                                                                                                                                                                                        |
| Article Type:                   | Research                                                                                                                                                                                                                                                                                                                                                                                                                                                                                   |
| Date Submitted by the Author:   | 05-Jul-2012                                                                                                                                                                                                                                                                                                                                                                                                                                                                                |
| Complete List of Authors:       | Velden, Peter G.; Institute for Psychotrauma, ; Tilburg University, INTERVICT<br>Rademaker, Arthur; Dutch Ministry of Defence, Research Center Military Mental Healthcare<br>Vermetten, Eric; Dutch Ministry of Defence, Research Center Military Mental Healthcare<br>Portengen, Marie-anne; Occupational health services ARBOUNIE,<br>Yzermans, Joris; Netherlands Institute for Health Services Research,<br>Grievink, Linda; National Institute for Public Health and the Environment, |
| <b>Primary Subject Heading</b>: | Mental health                                                                                                                                                                                                                                                                                                                                                                                                                                                                              |
| Secondary Subject Heading:      | Occupational and environmental medicine                                                                                                                                                                                                                                                                                                                                                                                                                                                    |
| Keywords:                       | mental health, psychiatry, OCCUPATIONAL & INDUSTRIAL MEDICINE                                                                                                                                                                                                                                                                                                                                                                                                                              |
|                                 |                                                                                                                                                                                                                                                                                                                                                                                                                                                                                            |

SCHOLARONE™  
Manuscripts

1  
2  
3 Police officers: a high risk group for mental health disturbances? A cohort study.  
4  
5  
6  
7  
8

9 Peter. G. van der Velden (Ph.D)<sup>a,b,c</sup>  
10

11 Arthur R. Rademaker (Ph.D)<sup>d</sup>  
12

13 Eric Vermetten ( M.D. Ph.D.)<sup>d</sup>  
14

15 Marie-Anne Portengen (M.D.)<sup>e</sup>  
16

17 Joris C. Yzermans (Ph.D.)<sup>f</sup>  
18

19 Linda Grievink (Ph.D.)<sup>g</sup>  
20  
21  
22  
23  
24  
25  
26  
27  
28  
29  
30

31 <sup>a</sup> Institute for Psychotrauma, Nienoord 5, Diemen, The Netherlands  
32

33 <sup>b</sup> INTERVICT, Tilburg University, Tilburg, the Netherlands  
34  
35  
36

37 <sup>c</sup> Arq Psychotrauma Expert Group, Diemen, The Netherlands  
38  
39

40 <sup>d</sup> Military Mental Health Research Center and University Medical Center Utrecht, Utrecht,  
41  
42 The Netherlands  
43  
44

45 <sup>e</sup> Occupational health services ARBOUNIE, Dordrecht, The Netherlands  
46  
47

48 <sup>f</sup> Netherlands Institute for Health Services Research, Utrecht, The Netherlands  
49  
50

51 <sup>g</sup> National Institute for Public Health and the Environment, Bilthoven, The Netherlands  
52  
53  
54  
55  
56  
57  
58  
59  
60

**Keywords**

Police officers, Mental health, Comparative study

**Word count**

2546 (exc. Title page, abstract, references, "what this study adds, and tables)

For peer review only

**ABSTRACT****Objectives**

Policing is generally considered a high risk profession for mental health problems, but this assumption lacks empirical evidence. Research question of the present study is to what extent officers more often suffer from mental health disturbances, such as (very) severe symptoms of anxiety, depression and hostility than other occupational groups.

**Design**

Multi-comparative cross sectional study using the data of several cross sectional and longitudinal studies in the Netherlands.

**Participants**

Two samples of police officers (N=149, N=522), employees of banks (N=1116) and employees of banks who were robbed (N=149); employees of supermarkets (N=331), and a psychiatric hospital (N=220), a governmental social welfare organization (N=91), employees who followed a RET training to strengthen their assertiveness (N=715), soldiers before deployment (N=283) and before re-deployment (N=239), and firefighters (N=129).

**Primary outcomes**

Prevalences of severe (sub clinical level) and very severe symptoms (clinical level) were computed using the Dutch norm tables (80<sup>th</sup> percentile en 95<sup>th</sup> percentile respectively) of the SCL-90-R. All comparisons were controlled for age, gender and education.

**Results**

Multinomial logistic regression analyses showed that the prevalences of clinical and sub clinical levels of symptoms of anxiety, depression and hostility among police officers were not significantly higher than among comparison groups. The same pattern was found for the other SCL-90-R sub scales.

**Conclusions**

We found no indications that self-reported mental health disturbances were more prevalent among police officers than among groups of employees that are not considered high risk groups, such as employees of banks, supermarkets, psychiatric hospital and soldiers before deployment.

1  
2  
3  
4  
5  
6 Police officers are commonly referred to as a high-risk group for mental health disturbances  
7  
8 because of the various critical incidents and potential traumatic events they encounter on a  
9  
10 more or less daily basis during their career. These so-called operational stressors, such as  
11  
12 viewing children die, confrontations with victims of sexual harassment, serious traffic  
13  
14 accidents, suicide, and violence, might increase the risk of for example symptoms of anxiety,  
15  
16 hostility and fatigue. A (small) minority may develop mental disorders, such as depression  
17  
18 and PTSD<sup>1-4</sup>.  
19  
20  
21

22  
23 On the other hand, research in the past 20 years among police officers has shown  
24  
25 that organizational stressors such as conflicts, work load, shifts, and lack of support are more  
26  
27 likely adverse sources of stress than operational stressors. In other words, although police  
28  
29 officers are more frequently confronted with critical incidents than for example employees  
30  
31 of banks or supermarkets, organizational stressors -that are not specific for the police-  
32  
33 appear more influential on health and well-being than (daily) operational stressors<sup>2, 5-7</sup>.  
34  
35  
36

37 This may explain the outcomes of a study<sup>8</sup> in the U.K. ranking 26 professions  
38  
39 according to general psychological well-being and physical health. Police officers ranked 9th  
40  
41 and 11th place in a ranking based on absolute mean scores with those with most problems  
42  
43 at 1<sup>th</sup> place. Teachers, a professional group that is typically not associated with frequent  
44  
45 exposure to potential traumatic stressors, ranked 2<sup>th</sup> on both well-being and physical health.  
46  
47  
48 Similarly, an earlier smaller comparative study reported that police officers showed  
49  
50 significantly more favorable levels of well-being and psychological distress when compared  
51  
52 to school teachers and the Australian norms<sup>9</sup>.  
53  
54

55  
56 However, to the best of our knowledge, there are no in peer reviewed-journal  
57  
58 reviewed published multi-comparative studies available that a.) statistically examined  
59  
60

1  
2  
3 differences in symptom levels between the police and several other occupational groups  
4  
5 while also controlling for confounding factors such as age, gender and education, and b.)  
6  
7 focused on specific mental health disturbances such as clinical relevant levels of symptoms  
8  
9 (very severe symptoms) of anxiety, depression, and hostility as well as sub clinical levels , i.e.  
10  
11 severe levels of symptom scores. Aim of this comparative study was to explore the relative  
12  
13 mental health of police officers and to investigate if there are empirical based indications  
14  
15 that policing can be considered a high risk profession in this perspective.  
16  
17  
18  
19  
20  
21  
22  
23

## 24 **METHODS**

### 25 **Samples and procedures**

26  
27  
28  
29 We compared the health of two samples of officers ( $N^{\text{group1}}=149$ ,  $N^{\text{group2}}=524$ ). Group 1  
30  
31 consisted of police officers obtained in the eastern part of the Netherlands (region  
32  
33 department North and East Gelderland,  $N=149$ , response=60%)<sup>10</sup>. This group was originally  
34  
35 obtained to provide reference data for group 2 to examine the consequences of the disaster  
36  
37 and other critical incidents on health. Group 2 consisted of police officers who were involved  
38  
39 in the Enschede fireworks disaster and the aftermath (The Netherlands, 2000) and  
40  
41 participating at a survey 4 years post-event (response= 80.5%)<sup>5</sup>. At that time, only 1 officer  
42  
43 (0,2%) suffered from probable disaster-related PTSD. These studies were conducted on  
44  
45 behalf of the Dutch Ministry of Health, Welfare and Sports.  
46  
47  
48  
49  
50  
51

52 We compared the two groups of officers with the following non-clinical groups of  
53  
54 employees participating in various Dutch studies on health and critical incidents at work.  
55  
56 Futhermore, data from group 6 was obtained to evaluate a training program (see below).  
57  
58  
59  
60

1  
2  
3 The year of data gathering is presented between brackets and funding for each study will be  
4  
5 described. In sum, this study is a clear example of a data-sharing research project of the  
6  
7 involved researchers.  
8  
9

- 10 - Group 3 and 4 (1991): A nationwide sample of 1294 front office employees of saving  
11 banks , of whom 11.5% experienced one of more bank robberies ( $N^{\text{group3}}=1116$  and  
12  $N^{\text{group4}}=149$  respectively, response=71%)<sup>11</sup>. This cross sectional study was conducted  
13  
14 on behalf of a Saving Banks Association, The Netherlands.  
15  
16
- 17 - Group 5 (1996): An at random sample of 220 mental health care professionals, i.e.  
18 nurses and therapists of a psychiatric hospital ( $N=220$ , response=70%)<sup>12</sup>. This cross  
19 sectional study was conducted on behalf of a Psychiatric Hospital.  
20  
21
- 22 - Group 6 (1997-1998): Employees of various organizations, before participating in a  
23 RET training ( $N=716$ , response=74%)<sup>13</sup> aimed at improving their assertiveness and  
24 well-being. The cross sectional study was provided by a training institute, The  
25  
26 Netherlands.  
27  
28
- 29 - Group 7 and 8 (2005-2007): Sample of 522 soldiers from a larger prospective cohort  
30 study on stress-related disorders who were assessed prior to a 4-month deployment  
31 to Afghanistan of whom 241 were deployed before ( $N^{\text{group7}}=281$  and  $N^{\text{group8}}=238$   
32  
33 respectively, response= 82.5%)<sup>14</sup>, was provided by the Ministry of Defense.  
34  
35
- 36 - Group 9 (2002): Firefighters from the firefighters department Utrecht ( $N=129$ ,  
37 response=48%)<sup>15</sup>. This cross sectional study conducted on behalf of the Dutch  
38  
39 Ministry of Health, Welfare and Sports.  
40  
41
- 42 - Group 10 (1995): Employees of a governmental Social Welfare organization who had  
43 contact with clients ( $N=91$ , response=65%)<sup>16</sup>, in the Western part of the Netherlands.  
44  
45  
46  
47  
48  
49  
50  
51  
52  
53  
54  
55  
56  
57  
58  
59  
60



1  
2  
3 This cross sectional study was conducted to finish the Occupational Physician  
4 education program of the researcher.  
5

- 6  
7 - Groups 11 (1996): A nationwide at random sample of employees of local  
8 supermarkets (N=331, response=88%)<sup>17</sup>. This cross sectional study was conducted on  
9 behalf of a large Supermarket Organization in the Netherlands.  
10  
11  
12

13  
14 All participants of the above mentioned studies received written information about the  
15 scientific study aims. None of the above mentioned involved organizations were involved in  
16 the study design, analyses and manuscript.  
17  
18  
19  
20  
21

## 22 23 24 **Measures**

25  
26 Besides questions regarding age, gender and education, respondents of all groups minus  
27 group 9 completed the total SCL-90-R<sup>18,19</sup>. The SCL-90-R has a five-point Likert scale (from  
28 1, 'not at all' to 5, 'extremely') and assesses symptoms over the previous 7 days. The validity  
29 and reliability of the Dutch SCL-90-R has proven to be satisfactory. The Dutch cut-off scores<sup>19</sup>  
30 for males and females of a normal population were used to identify participants with a.) at  
31 least severe symptoms of anxiety, depression, sleeping problems and hostility (80<sup>th</sup>  
32 percentile,) and b.) with very severe symptoms (95<sup>th</sup> percentile) that are clinically relevant  
33 and may be indicative for a mental disorder. Group 9 was administered a brief scale  
34 consisting of 17 at random items of the SCL-90-R. Our control analyses showed that the sum  
35 score of the 17 items highly correlated with the total score of the SCL-90-R across several  
36 samples who filled in the total SCL-90-R ( $r > .95$ ). Assessments of education levels differed  
37 slightly across studies. We were therefore forced to make a distinction between those with  
38 high education (university and high professional education level) versus low-medium level  
39 (all other levels).  
40  
41  
42  
43  
44  
45  
46  
47  
48  
49  
50  
51  
52  
53  
54  
55  
56  
57  
58  
59  
60

## Data analyses

Differences in demographics were assessed using chi-square statistics. Separate series of multinomial logistic regression analyses were conducted with each police sample as reference group, while controlling for age, gender and educational level. We repeated the regression analyses with two composite variables on mental health. They were based on 1.) whether respondents reported very severe anxiety and/or very severe depression and/or very severe hostility symptoms or did not report severe symptoms on any of these three scales, and 2.) a similar computed composite variable based of severe symptoms. ANOVA was used to examine differences in mean scores on the sum score of 17 items between group 1, 2 and 9 while controlling for the same possible confounding factors. SPSS version 18.0 was used to perform the analyses.

## RESULTS

The demographics are shown in Table 1 and chi-squares statistics indicate that study groups differ in gender ( $X^2=922.7$ ,  $df=10$ ,  $p < .001$ ), age ( $X^2=1324.0$ ,  $df=20$ ,  $p < .001$ ) and educational level ( $X^2=927.7$ ,  $df=10$ ,  $p < .001$ ).

The prevalence's of very severe symptoms (95<sup>th</sup> percentile) are presented (except group 9) in Table 2, as well as the adjusted Odd Ratios (Adj. OR) and the 95% confidence intervals (95% CI). In Table 3, similar statistics are presented with respect to severe symptoms (80<sup>th</sup> percentile).

Results clearly show that both groups of police officers are relatively healthy: the proportion of officers with very severe symptoms of anxiety, depression, and hostility is extremely low ( $\leq 1.4\%$ ). Compared to all other study groups, police officers had similar or

1  
2  
3 lower prevalences of clinical levels of mental health problems according to the adjusted odd  
4  
5 ratios. Using a less strict criterion of sub clinical levels, i.e. at least severe symptoms instead  
6  
7 of very severe symptoms according to the norm tables, the groups of officers still did rank as  
8  
9 groups with relatively low prevalence rates. Furthermore, the proportion of officers with  
10  
11 severe or very severe symptoms of anxiety or depression or hostility (i.e. composite  
12  
13 variables), is not significantly higher than among other groups. Additional multinomial  
14  
15 analyses showed similar patterns with respect to the other sub scales of the SCL-90-R (data  
16  
17 not shown).

18  
19  
20  
21 The results of ANOVA ( $F^{\text{main}}=25.5$ ,  $df=2$ ,  $p < .001$ ) and post hoc analyses showed that  
22  
23 the 2004 sample of police officers had significant lower mean scores on the 17 item sum  
24  
25 score than employees of supermarkets, while the 2002 sample did not differ significantly  
26  
27 from supermarket employees (Police<sup>2002</sup>:  $M=20.7$ ,  $SD=5.9$ ; Police<sup>2004</sup>:  $M=18.9$ ,  $SD=4.37$ ;  
28  
29 Super market:  $M=22.6$ ,  $SD=7.28$ ).

## 30 31 32 33 34 35 36 **DISCUSSION**

37  
38 We found no indication that police officers had higher prevalences of subclinical mental  
39  
40 health problems, i.e. severe symptoms, than other occupational groups in our comparative  
41  
42 study. The same pattern was found with respect to very severe symptoms, i.e. a level of  
43  
44 symptoms that may be indicative of the presence of mental disorders such as generalized  
45  
46 anxiety disorder or major depressive disorder. Surprisingly, findings showed that officers in  
47  
48 our comparative study were as healthy as our study groups that are not considered high risk  
49  
50 professions, such as employees of banks (not victimized by robberies), supermarket  
51  
52 employees, mental health care professionals and soldiers before deployment. Moreover,  
53  
54 they strongly differed from employees participating in a RET training because of mental  
55  
56  
57  
58  
59  
60

1  
2  
3 health problems that were associated with a lack of assertiveness. Although we are not  
4  
5 aware of a similar multi-comparative study, these findings appear are in line with the  
6  
7 outcomes of a Dutch study on burnout among officers showing that officers had lower levels  
8  
9 of emotional exhaustion than one large reference group consisting of various occupations<sup>20</sup>,  
10  
11 a Norwegian study<sup>1</sup> also showing that officers had lower levels of emotional exhaustions  
12  
13 (but higher levels of depersonalization) than physicians, and the outcomes of the  
14  
15 aforementioned studies<sup>8,9</sup>, but these studies did not control the possible confounding  
16  
17 effects of demographics.  
18  
19  
20

21  
22 How can these findings be explained? In the Dutch situation police officers follow a  
23  
24 rigorous selection process: about 90% of those applying to the officer training program is  
25  
26 being rejected (personal communication Dr. Annika Smit, Dutch Police Academy). Moreover,  
27  
28 officers are trained to deal and cope with critical incidents and as a consequence they may  
29  
30 be highly resilient to mental health problems<sup>21</sup>. This may explain why bank employees (not  
31  
32 selected to cope with severe incidents nor trained as rigorously as police officers), who were  
33  
34 confronted with bank robberies reported significantly more (severe and very severe) mental  
35  
36 health disturbances.  
37  
38  
39

40  
41 Interestingly, in an older true prospective study among police officers involved as  
42  
43 body handlers in a disaster no increases in health problems compared with health problems  
44  
45 before the disasters were found<sup>22</sup>. These outcomes seriously question the generally held  
46  
47 belief that policing is a high risk profession with respect to health: is it perhaps a (partial)  
48  
49 myth? In either way, it reminds us of the debate on suicide among officers that once (in fact)  
50  
51 has been described as an epidemic<sup>23</sup>: However, the critical review on suicide among officers  
52  
53 of Hem and colleagues<sup>23</sup> clearly demonstrated that it is not documented that an elevated  
54  
55  
56  
57  
58  
59  
60

1  
2  
3 suicide rate among officers really exists and that previous research has serious  
4  
5 methodological shortcomings.  
6

7  
8 Despite the strength of our study, i.e. multiple comparison groups and controlling for  
9  
10 age, gender and education, some possible limitations and characteristics should be  
11  
12 discussed. First, although very high scores on the SCL-90-R (very severe symptoms) may be  
13  
14 indicative of a mental disorder, we did not conduct clinical interviews to examine the  
15  
16 prevalences of mental disorders such as generalized anxiety, major depression and PTSD  
17  
18 across samples. However, it is not very likely that the prevalence rates obtained from  
19  
20 clinician rated instruments would be (much) higher than the prevalence rates obtained by  
21  
22 self-report measures such as the SCL-90-R<sup>24</sup>.  
23  
24  
25

26  
27 Second, we did not include a PTSD measure in the present study. Therefore, it is  
28  
29 possible that the prevalence of PTSD among police officers is higher than among the other  
30  
31 study groups. However, given the marked overlap of PTSD symptoms with other disorders  
32  
33 and the typical comorbidity rates of PTSD with for instance depression<sup>25,26</sup>, it is unlikely that  
34  
35 when police officers suffer from PTSD, that they do not suffer from other severe mental  
36  
37 health disturbances as well. Indeed, a large study among UK military personnel (N=10069)<sup>27</sup>  
38  
39 showed that 344 out of the 394 PTSD cases (87.3%) reported mental health problems, i.e.  
40  
41 were GHQ cases. Only a small group of PTSD cases (N=50, 12.7%) were not identified as  
42  
43 being a GHQ case (personal communication dr. Roberto Rona). Control analyses among  
44  
45 another sample (N=67) of Dutch employees seeking treatment at the Institute for  
46  
47 Psychotrauma for (probable) PTSD following various traumatic events, showed similar  
48  
49 results. In total, 86.6% (N=58) of the (probable) PTSD cases (N=67, IES scores of 35 or  
50  
51 more<sup>28</sup>) also reported very severe mental health problems according to our composite  
52  
53 variable using very severe symptoms. These findings are in line with previous research<sup>28,30</sup>,  
54  
55  
56  
57  
58  
59  
60

1  
2  
3 demonstrating that PTSD and SCL-90-R scores are strongly associated. Thus, an increased  
4  
5 prevalence rate for PTSD in the absence of marked mental problems would be highly  
6  
7 unlikely.  
8  
9

10 Third, the two groups of officers were not drawn from national samples of officers.  
11  
12 Group 1 was obtained in the eastern part of the Netherlands, but group 2 consisted of  
13  
14 officers from several parts of the Netherlands (mainly east, mid and west). We have no data  
15  
16 on the non-response of group 1. Although both groups did not differ in prevalence rates of  
17  
18 very severe anxiety, depression and hostility symptoms (i.e. clinical level of symptoms),  
19  
20 significant differences were found in the prevalence of severe depression symptoms (80<sup>th</sup>  
21  
22 percentile). This may reflect the normal variety of the prevalences of symptoms among sub  
23  
24 samples within one occupational group. Finally, one could hypothesize that the data of our  
25  
26 study groups are not obtained very recently and that for instance the current prevalences of  
27  
28 mental health problems among officers are (much) higher. We have no data or (Dutch)  
29  
30 reports based on empirical research to confirm or reject this hypothesis.  
31  
32  
33  
34  
35

36 Participants of all nine study groups were living in the Netherlands. Therefore, future  
37  
38 research is warranted to examine to what extent our findings are applicable to countries  
39  
40 with different political, social and juridical systems, and different selection and training  
41  
42 procedures. We were not able to control for for example organizational stressors across all  
43  
44 study samples, although we do not expect that it would dramatically change our findings.  
45  
46 Finally, we did not examine substance use such as alcohol use and smoking. Although the  
47  
48 outcomes of Sterud and colleagues<sup>31</sup> did not support the notion of a strong relationship  
49  
50 between occupational stress and alcohol use in police officers, it is unclear if they differ in  
51  
52 use from other professions.  
53  
54  
55  
56  
57  
58  
59  
60

## CONCLUSIONS

Despite these limitations, the present study demonstrates that, although policing is generally viewed as a high risk profession, mental health disturbances are not more prevalent in police officers as compared to various other occupational cohorts in our study. Several of these groups such as bank employees (not being robbed) and supermarket employees, as well as soldiers before deployment are typically not considered as “high risk professions”. These findings suggest that the positive effects of especially the selection process, self-selection and resilience of officers, given the amount of potential stressful and traumatic events they encounter during their career, should not be underestimated.

## Abstract

### Article focus

- It is generally assumed that police officers, due to the specific nature of their work, are at (high) risk for mental health problems.
- The results of the very few studies that compared the mental health of officers with one of two comparison groups, suggest that this assumption need further proof.
- To assess this assumption, clinical as well as sub clinical levels of mental health problems of officers were compared with 9 other occupational groups while controlling for demographics.

### Key messages

- In contrast to this generally held belief, officers were not more at risk for (serious) mental health problems than any of the other examined groups in our multi-comparative study.
- The protective effects of a rigor selections process of recruits, self-selection and the resilience of police officers on mental health disturbances should not be underestimated.

### Strenghts and limitations

- To the best of our knowledge, this is the first multi comparative study to examine to what extent clinical as well as sub clinical levels of symptoms of anxiety, depression



1  
2  
3 and hostility are more prevalent among officers than among other occupations while  
4  
5 controlling for demographics.  
6

- 7 • We did not conduct clinical interviews  
8  
9

### 10 11 12 13 14 **Acknowledgements**

15  
16  
17 We would like to express our gratitude to Professor RJ Rona (Institute of Psychiatry, King's  
18  
19 College London) for his courteous help, i.e. providing us the cross tabulation data on PTSD  
20  
21 and GHQ cases among UK military. In addition, we like to thank M Bosmans, Msc  
22  
23 (INTERVICT, Tilburg University) for his support.  
24  
25  
26  
27  
28  
29  
30

### 31 **Competing interests**

32  
33  
34 None.  
35  
36  
37  
38  
39  
40  
41  
42  
43  
44  
45  
46  
47  
48  
49  
50  
51  
52  
53  
54  
55  
56  
57  
58  
59  
60

## References

1. **Berg AM**, Hem E, Lau B, et al. An exploration of job stress and health in the Norwegian police service: cross sectional study. *J Occup Med Toxicol* 2006; **1**:26.
2. **Maguen S**, Metzler TJ, McCaslin SE, et al. Routine work environment stress and PTSD symptoms in police officers. *J Nerv and Ment Dis* 2009; **197**: 754–760.
3. **Stephens C**, Miller I. Traumatic experiences and posttraumatic stress disorder in the New Zealand police. *Policing* 1998; **21**: 178–191.
4. **Hartley TA**, Violanti JM, Fekedulegn D, et al. Associations between major life events, traumatic incidents, and depression among Buffalo police officers. *Int J Emerg Ment Health* 2007; **9**: 25–35.
5. **Velden PG van der**, Kleber RJ, Grievink L, et al. Confrontations with aggression and mental health problems in police officers: The role of organizational stressors, life-events and previous mental health problems. *Psychol Trauma: Theory, Res, Practice, Policy* 2010; **2**: 135–144.
6. **Liberman AM**, Best SR, Metzler TJ, et al. Routine occupational stress and psychological distress in police. *Policing* 2002; **25**: 421–439.
7. **Huddleston L**, Stephens C, Paton D. An evaluation of traumatic and organizational experiences on the psychological health of New Zealand police recruits. *Work* 2007; **28**: 199–207.
8. **Johnson S**, Cooper C, Cartwright S, et al. The experience of work-related stress across occupations. *J Manag Psychol* 2005; **20**: 178-187.

- 1  
2  
3  
4  
5  
6  
7  
8  
9  
10  
11  
12  
13  
14  
15  
16  
17  
18  
19  
20  
21  
22  
23  
24  
25  
26  
27  
28  
29  
30  
31  
32  
33  
34  
35  
36  
37  
38  
39  
40  
41  
42  
43  
44  
45  
46  
47  
48  
49  
50  
51  
52  
53  
54  
55  
56  
57  
58  
59  
60
9. **Hart PM**, Wearing AJ, Headey B. Police stress and well-being: Integrating personality, coping and daily work experiences. *J Occup Organ Psychol* 1995; **68**: 133–165.
  10. **Velden PG van der**, Grievink L, Dusseldorp A, et al. *Health victims Enschede fireworks disaster* (In Dutch). Instituut voor Psychotrauma (IvP)/ Rijksinstituut voor Volksgezondheid en Milieu (RIVM), 2002.
  11. **Velden PG van der**, Burg S van der, Steinmetz CHD, et al. *Victim of bank robberies* (in Dutch). Bohn Stafleu Van Loghem, 1992.
  12. **Velden PG van der**, Herpers TMM. Aggression in a psychiatric hospital (in Dutch). *Gedrag & Gezondheid* 1994; **5**: 209-218.
  13. **Velden PG van der**, Kleber RJ, Oostrom I van. *StressMonitor manual* (in Dutch). Instituut voor Psychotrauma/S&N, 2000.
  14. **Rademaker AR**, van Zuiden M, Vermetten E, et al. Type D personality and the development of PTSD symptoms: a prospective study. *J Abnorm Psychol* 2011; **120** (2), 299-307.
  15. **Velden PG van der**, Christiaanse B, Kleber RJ, et al. The effects of disaster exposure and post-disaster critical incidents on intrusions, avoidance and health problems among firefighters: A comparative study. *Stress, Trauma Crisis: International J* 2006; **9**: 73–93.
  16. **Portengen MAF**. *Aggression and violence in social welfare* (in Dutch). Corvu / AMC Amsterdam, 1995.
  17. **Velden PG van der**. *Investigation of unsafe situations in supermarkets* (in Dutch). Instituut voor Psychotrauma, 1996.

- 1  
2  
3  
4  
5  
6  
7  
8  
9  
10  
11  
12  
13  
14  
15  
16  
17  
18  
19  
20  
21  
22  
23  
24  
25  
26  
27  
28  
29  
30  
31  
32  
33  
34  
35  
36  
37  
38  
39  
40  
41  
42  
43  
44  
45  
46  
47  
48  
49  
50  
51  
52  
53  
54  
55  
56  
57  
58  
59  
60
18. **Derogatis LR**. *SCL-90-R: administration, scoring and procedures manual-I for the R(evised) version*. Johns Hopkins University School of Medicine, Clinical Psychometrics Research Unit, 1977.
  19. **Arrindell WA**, Ettema JHM. *SCL-90-R Manual* (in Dutch). Swets & Zeitlinger/ Swets Test publishers, 1986 & 2003.
  20. **Kop N**, Euwema M, Schaufeli W. Burnout, job stress and violent behavior among Dutch police officers. *Work & Stress* 1999; **13**: 326-340.
  21. **Galatzer-Levy IR**, Madan A, Neylan TC, et al. Peritraumatic and trait dissociation differentiate police officers with resilient versus symptomatic trajectories of posttraumatic stress symptoms. *J Trauma Stress* 2011; **24**: 557-65.
  22. **Alexander DA**, Wells A. Reactions of police officers to body handling after a major disaster: a before and after comparison. *Br J Psychiatry* 1991; **159**: 547-555.
  23. **Hem E**, Berg AM, Ekeberg AO. Suicide in police--a critical review. *Suicide Life Threat Behav* 2001; **31**: 224-33.
  24. **Engelhard IM**, van den Hout MA, et al. Deployment-related stress and trauma in Dutch soldiers returning from Iraq. Prospective study. *Br J Psychiatry* 2007; **191**: 140-145.
  25. **Deering CG**, Glover SG, Ready D, et al. Unique patterns of comorbidity in posttraumatic stress disorder from different sources of trauma. *Compr Psychiatry* 1996; **37**: 336-346.
  26. **Blanchard EB**, Buckley TC, Hickling EJ, Taylor AE. Posttraumatic stress disorder and comorbid major depression: is the correlation an illusion? *J Anxiety Disord* 1998; **12**: 21-37.

- 1  
2  
3 27. **Rona RJ**, Jones M, Iversen A, et al. The impact of posttraumatic stress disorder on  
4  
5 impairment in the UK military at the time of the Iraq war. *J Psychiatry Res* 2009; **43**  
6  
7 (6): 649-55.  
8  
9
- 10 28. **Neal LA**, Busutti W, Rollins JI, et al. convergent validity of measures of Post-  
11  
12 Traumatic Stress Disorder in a mixed military and civilian population. *J Trauma Stress*  
13  
14 1994; **7**: 447-455.  
15  
16
- 17 29. **Saunders BE**, Mandoki Arata C, Kilpatrick D. Development of a crime-related Post-  
18  
19 Traumatic Stress Disorder scale for women within the symptom checklist-90-revised.  
20  
21 *J Trauma Stress* 1990; **3**: 439-448.  
22  
23
- 24 30. **Weathers FW**, Litz BT, Keane TM, et al. The utility of the SCL-90-R for the diagnosis of  
25  
26 war-zone related Posttraumatic Stress Disorder. *J Trauma Stress* 1996; **9**: 111-128.  
27  
28
- 29 31. **Sterud T**, Hem E, Ekeberg O, et al. Occupational stress and alcohol use: a study of two  
30  
31 nationwide samples of operational police and ambulance, personnel in Norway. *Stud*  
32  
33 *Alcohol Drugs* 2007; **68** (6):896-904.  
34  
35  
36  
37  
38  
39  
40  
41  
42  
43  
44  
45  
46  
47  
48  
49  
50  
51  
52  
53  
54  
55  
56  
57  
58  
59  
60

1  
2  
3  
4  
5  
6  
7  
8  
9  
10  
11  
12  
13  
14  
15  
16  
17  
18  
19  
20  
21  
22  
23  
24  
25  
26  
27  
28  
29  
30  
31  
32  
33  
34  
35  
36  
37  
38  
39  
40  
41  
42  
43  
44  
45  
46  
47  
48  
49  
50  
51  
52  
53  
54  
55  
56  
57  
58  
59  
60

For peer review only

Table 1 Demographics

|                                          | N    | Gender |         | Age (years) |       |       | Education  |      |
|------------------------------------------|------|--------|---------|-------------|-------|-------|------------|------|
|                                          |      | males  | females | 18-30       | 31-45 | 46-65 | low-medium | high |
|                                          |      | %      | %       | %           | %     | %     | %          | %    |
| 1 Police officers                        | 149  | 85,9   | 14,1    | 4,7         | 49,0  | 46,3  | 96,5       | 3,5  |
| 2 Police officers                        | 522  | 88,5   | 11,5    | 6,2         | 56,5  | 37,2  | 91,7       | 8,3  |
| 3 Bank employees, not victim bankrobbery | 1116 | 34,1   | 65,9    | 48,6        | 38,2  | 13,2  | 81,0       | 19,0 |
| 4 Bank employees, victim bankrobbery     | 149  | 47,3   | 52,7    | 37,8        | 44,6  | 17,6  | 79,1       | 20,9 |
| 5 Psychiatric hospital employees         | 220  | 37,7   | 62,3    | 41,4        | 47,7  | 10,9  | 61,6       | 38,4 |
| 6 Trainees AT                            | 715  | 68,2   | 31,8    | 28,7        | 58,1  | 13,2  | 34,0       | 66,0 |
| 7 Soldiers, not deployed before          | 281  | 88,1   | 11,9    | 80,2        | 16,1  | 3,7   | 88,9       | 11,1 |
| 8 Soldiers, deployed before              | 238  | 93,9   | 6,1     | 43,4        | 43,0  | 13,5  | 85,1       | 14,9 |
| 9 Firefighters                           | 129  | 96,9   | 3,1     | 18,3        | 39,7  | 42,0  | 94,5       | 5,5  |
| 10 Social welfare                        | 91   | 44,4   | 55,6    | 15,7        | 49,4  | 34,9  | 39,5       | 60,5 |
| 11 Supermarkets                          | 331  | 56,1   | 43,9    | 100         | -     | -     | 86,9       | 13,1 |
| Total                                    | 3944 | 62,1   | 37,9    | 41,8        | 41,0  | 17,2  | 74,2       | 25,8 |

Table 2 Differences in prevalences of very severe anxiety, depression and/or hostility symptoms (scores 95<sup>th</sup> centile).

|                                          | Very severe symptoms |    |     | Police A reference |                  |     | Police B reference |                  |     |
|------------------------------------------|----------------------|----|-----|--------------------|------------------|-----|--------------------|------------------|-----|
|                                          | Total N              | N  | %   | Adj. OR            | (95% CI)         | p   | Adj. OR            | (95% CI)         | p   |
| <b>ANXIETY</b>                           |                      |    |     |                    |                  |     |                    |                  |     |
| 1 Police officers                        | 149                  | 2  | 1.3 | 1                  |                  |     |                    |                  |     |
| 2 Police officers                        | 522                  | 3  | 0.6 | 0.53               | ( 0.23 - 1.23 )  | .14 | 1                  |                  |     |
| 3 Bank employees, not victim bankrobbery | 1116                 | 9  | 0.8 | 1.59               | ( 0.76 - 3.33 )  | .22 | 2.98               | ( 1.69 - 5.24 )  | .00 |
| 4 Bank employees, victim bankrobbery     | 148                  | 7  | 4.7 | 5.41               | ( 2.43 - 12.04 ) | .00 | 10.14              | ( 5.33 - 19.26 ) | .00 |
| 5 Psychiatric hospital employees         | 220                  | 1  | 0.5 | 2.35               | ( 1.02 - 5.40 )  | .04 | 4.41               | ( 2.23 - 8.70 )  | .00 |
| 6 Trainees AT                            | 715                  | 32 | 4.5 | 5.98               | ( 2.88 - 12.45 ) | .00 | 11.22              | ( 6.46 - 19.48 ) | .00 |
| 7 Soldiers, not deployed before          | 281                  | 2  | 0.7 | 1.14               | ( 0.46 - 2.80 )  | .77 | 2.14               | ( 1.00 - 4.55 )  | .05 |
| 8 Soldiers, deployed before              | 241                  | 0  | 0.0 | n.a.               |                  |     | n.a.               |                  |     |
| 9 Firefighters                           | 129                  | 0  | 0.0 | n.a.               |                  |     | n.a.               |                  |     |
| 10 Social welfare                        | 85                   | 1  | 1.2 | 4.32               | ( 1.70 - 10.97 ) | .00 | 8.10               | ( 3.64 - 18.02 ) | .00 |
| <b>DEPRESSION</b>                        |                      |    |     |                    |                  |     |                    |                  |     |
| 1 Police officers                        | 149                  | 2  | 1.3 | 1                  |                  |     |                    |                  |     |
| 2 Police officers                        | 518                  | 6  | 1.2 | 0.86               | ( 0.17 - 4.33 )  | .86 | 1                  |                  |     |
| 3 Bank employees, not victim bankrobbery | 1116                 | 30 | 2.7 | 2.33               | ( 0.53 - 10.16 ) | .26 | 2.70               | ( 1.07 - 6.79 )  | .04 |



24

|                                      |     |    |     |                       |     |                        |     |
|--------------------------------------|-----|----|-----|-----------------------|-----|------------------------|-----|
| 4 Bank employees, victim bankrobbery | 148 | 13 | 8.8 | 7.85 ( 1.70 - 36.18 ) | .01 | 9.08 ( 3.31 - 24.94 )  | .00 |
| 5 Psychiatric hospital employees     | 220 | 13 | 5.9 | 5.29 ( 1.14 - 24.53 ) | .03 | 6.12 ( 2.21 - 16.94 )  | .00 |
| 6 Trainees AT                        | 716 | 69 | 9.6 | 8.87 ( 2.07 - 37.96 ) | .00 | 10.27 ( 4.22 - 25.00 ) | .00 |
| 7 Soldiers, not deployed before      | 283 | 2  | 0.7 | 0.46 ( 0.06 - 3.52 )  | .46 | 0.54 ( 0.10 - 2.84 )   | .46 |
| 8 Soldiers, deployed before          | 239 | 2  | 0.8 | 0.58 ( 0.08 - 4.26 )  | .59 | 0.67 ( 0.13 - 3.42 )   | .63 |
| 9 Firefighters                       | 129 | 2  | 1.6 | 1.14 ( 0.16 - 8.24 )  | .90 | 1.32 ( 0.26 - 6.63 )   | .74 |
| 10 Social welfare                    | 85  | 5  | 5.9 | 4.68 ( 0.81 - 27.09 ) | .09 | 5.41 ( 1.43 - 20.50 )  | .01 |

## HOSTILITY

|                                          |      |    |     |                       |     |                        |     |
|------------------------------------------|------|----|-----|-----------------------|-----|------------------------|-----|
| 1 Police officers                        | 149  | 2  | 1.3 | 1                     |     |                        |     |
| 2 Police officers                        | 524  | 5  | 1.0 | 0.72 ( 0.14 - 3.73 )  | .69 | 1                      | -   |
| 3 Bank employees, not victim bankrobbery | 1116 | 28 | 2.5 | 2.00 ( 0.45 - 8.82 )  | .36 | 2.79 ( 1.02 - 7.65 )   | .05 |
| 4 Bank employees, victim bankrobbery     | 148  | 9  | 6.1 | 5.11 ( 1.06 - 24.71 ) | .04 | 7.14 ( 2.29 - 22.28 )  | .00 |
| 5 Psychiatric hospital employees         | 220  | 7  | 3.2 | 2.74 ( 0.54 - 13.86 ) | .22 | 3.83 ( 1.15 - 12.70 )  | .03 |
| 6 Trainees AT                            | 714  | 44 | 6.2 | 6.32 ( 1.45 - 27.49 ) | .01 | 8.83 ( 3.30 - 23.61 )  | .00 |
| 7 Soldiers, not deployed before          | 281  | 7  | 2.5 | 1.62 ( 0.31 - 8.49 )  | .57 | 2.27 ( 0.66 - 7.81 )   | .20 |
| 8 Soldiers, deployed before              | 241  | 4  | 1.7 | 1.17 ( 0.21 - 6.68 )  | .86 | 1.64 ( 0.42 - 6.33 )   | .47 |
| 9 Firefighters                           | 130  | 2  | 1.5 | 1.13 ( 0.16 - 8.19 )  | .90 | 1.58 ( 0.30 - 8.27 )   | .59 |
| 10 Social welfare                        | 85   | 8  | 9.4 | 9.85 ( 1.91 - 50.80 ) | .01 | 13.76 ( 4.03 - 46.99 ) | .00 |

COMPOSITE VARIABLE: ANY MENTAL HEALTH PROBLEM<sup>1</sup>

|                   |     |   |     |                      |     |   |  |
|-------------------|-----|---|-----|----------------------|-----|---|--|
| 1 Police officers | 149 | 3 | 2.0 | 1                    |     |   |  |
| 2 Police officers | 516 | 7 | 1.4 | 0.67 ( 0.17 - 2.65 ) | .57 | 1 |  |

1  
2  
3  
4  
5  
6  
7  
8  
9  
10  
11  
12  
13  
14  
15  
16  
17  
18  
19  
20  
21  
22  
23  
24  
25  
26  
27  
28  
29  
30  
31  
32  
33  
34  
35  
36  
37  
38  
39  
40  
41  
42  
43  
44  
45  
46  
47  
48  
49

|                                          |      |    |      |                       |     |                        |     |
|------------------------------------------|------|----|------|-----------------------|-----|------------------------|-----|
| 3 Bank employees, not victim bankrobbery | 1116 | 51 | 4.6  | 2.72 ( 0.81 - 9.06 )  | .10 | 4.03 ( 1.76 - 9.22 )   | .00 |
| 4 Bank employees, victim bankrobbery     | 148  | 19 | 12.8 | 8.17 ( 2.32 - 28.79 ) | .00 | 12.12 ( 4.89 - 30.02 ) | .00 |
| 5 Psychiatric hospital employees         | 220  | 16 | 7.3  | 4.54 ( 1.27 - 16.28 ) | .02 | 6.73 ( 2.65 - 17.08 )  | .00 |
| 6 Trainees AT                            | 714  | 96 | 13.4 | 9.33 ( 2.83 - 30.78 ) | .00 | 13.83 ( 6.14 - 31.16 ) | .00 |
| 7 Soldiers, not deployed before          | 281  | 9  | 3.2  | 1.52 ( 0.38 - 6.01 )  | .55 | 2.25 ( 0.78 - 6.48 )   | .13 |
| 8 Soldiers, deployed before              | 238  | 6  | 2.5  | 1.22 ( 0.30 - 5.07 )  | .78 | 1.81 ( 0.59 - 5.55 )   | .30 |
| 9 Firefighters                           | 128  | 3  | 2.3  | 1.15 ( 0.23 - 5.82 )  | .87 | 1.70 ( 0.43 - 6.69 )   | .44 |
| 10 Social welfare                        | 85   | 11 | 12.9 | 8.13 ( 2.07 - 31.97 ) | .00 | 12.05 ( 4.19 - 34.64 ) | .00 |

---

Adj. OR = Odds ratio adjusted for age, gender and education. 95% CI = 95% confidence interval.

N.a = Not applicable because the prevalences of very severe anxiety symptoms among firefighter is zero. This group was therefore omitted from this analyses because OR cannot be computed.

<sup>1</sup> Anxiety and/or depression and/or hostility.

Due to missing data the number of respondents per groups differs a little on each SCL-90-R sub scale

Table 3 Differences in prevalences of severe anxiety, depression and/or hostility symptoms (scores 80<sup>th</sup> centile).

|                                          | Severe/<br>very severe<br>symptoms |     |      | Police A<br>reference<br>(95% CI) |            | Police B<br>reference<br>(95% CI) |     |
|------------------------------------------|------------------------------------|-----|------|-----------------------------------|------------|-----------------------------------|-----|
|                                          | Total<br>N                         | N   | %    | Adj.<br>OR                        | Adj.<br>OR |                                   |     |
|                                          |                                    |     |      |                                   |            |                                   |     |
| <b>ANXIETY</b>                           |                                    |     |      |                                   |            |                                   |     |
| 1 Police officers                        | 149                                | 11  | 7.4  | 1                                 |            |                                   |     |
| 2 Police officers                        | 522                                | 17  | 3.3  | 0.53 ( 0.23 - 1.23 )              | .14        | 1                                 |     |
| 3 Bank employees, not victim bankrobbery | 1116                               | 80  | 7.2  | 1.61 ( 0.77 - 3.37 )              | .21        | 3.01 ( 1.71 - 5.29 )              | .00 |
| 4 Bank employees, victim bankrobbery     | 148                                | 32  | 21.6 | 5.46 ( 2.45 - 12.15 )             | .00        | 10.22 ( 5.38 - 19.42 )            | .00 |
| 5 Psychiatric hospital employees         | 220                                | 22  | 10.0 | 2.38 ( 1.04 - 5.47 )              | .04        | 4.46 ( 2.26 - 8.80 )              | .00 |
| 6 Trainees AT                            | 715                                | 161 | 22.5 | 6.08 ( 2.92 - 12.62 )             | .00        | 11.37 ( 6.56 - 19.74 )            | .00 |
| 7 Soldiers, not deployed before          | 281                                | 18  | 6.4  | 1.13 ( 0.47 - 2.75 )              | .78        | 2.12 ( 1.01 - 4.47 )              | .05 |
| 8 Soldiers, deployed before              | 241                                | 12  | 5.0  | 0.90 ( 0.36 - 2.23 )              | .81        | 1.68 ( 0.78 - 3.64 )              | .19 |
| 9 Firefighters                           | 129                                | 5   | 3.9  | 0.64 ( 0.21 - 1.95 )              | .43        | 1.19 ( 0.43 - 3.29 )              | .74 |
| 10 Social welfare                        | 85                                 | 15  | 17.6 | 4.39 ( 1.73 - 11.12 )             | .00        | 8.21 ( 3.69 - 18.26 )             | .00 |
| <b>DEPRESSION</b>                        |                                    |     |      |                                   |            |                                   |     |
| 1 Police officers                        | 149                                | 17  | 11.4 | 1                                 |            |                                   |     |
| 2 Police officers                        | 518                                | 26  | 5.0  | 0.41 ( 0.22 - 0.79 )              | .01        | 1                                 |     |
| 3 Bank employees, not victim bankrobbery | 1116                               | 134 | 12.0 | 1.39 ( 0.79 - 2.45 )              | .25        | 3.37 ( 2.13 - 5.35 )              | .00 |

|                                                            |                                        |      |     |      |                      |     |                        |     |
|------------------------------------------------------------|----------------------------------------|------|-----|------|----------------------|-----|------------------------|-----|
| 4                                                          | Bank employees, victim bankrobbery     | 148  | 31  | 20.9 | 2.56 ( 1.32 - 4.95 ) | .01 | 6.19 ( 3.49 - 11.00 )  | .00 |
| 5                                                          | Psychiatric hospital employees         | 220  | 36  | 16.4 | 1.95 ( 1.03 - 3.73 ) | .04 | 4.73 ( 2.71 - 8.25 )   | .00 |
| 6                                                          | Trainees AT                            | 716  | 261 | 36.5 | 5.20 ( 2.96 - 9.12 ) | .00 | 12.58 ( 7.97 - 19.86 ) | .00 |
| 7                                                          | Soldiers, not deployed before          | 283  | 23  | 8.1  | 0.77 ( 0.38 - 1.58 ) | .48 | 1.87 ( 1.00 - 3.52 )   | .05 |
| 8                                                          | Soldiers, deployed before              | 239  | 18  | 7.5  | 0.69 ( 0.34 - 1.41 ) | .31 | 1.67 ( 0.88 - 3.14 )   | .12 |
| 9                                                          | Firefighters                           | 129  | 16  | 12.4 | 1.10 ( 0.53 - 2.29 ) | .80 | 2.66 ( 1.38 - 5.14 )   | .00 |
| 10                                                         | Social welfare                         | 85   | 20  | 23.5 | 2.75 ( 1.28 - 5.91 ) | .01 | 6.65 ( 3.32 - 13.32 )  | .00 |
| HOSTILITY                                                  |                                        |      |     |      |                      |     |                        |     |
| 1                                                          | Police officers                        | 149  | 17  | 11.4 | 1                    |     |                        |     |
| 2                                                          | Police officers                        | 524  | 34  | 6.5  | 0.55 ( 0.29 - 1.04 ) | .07 | 1                      |     |
| 3                                                          | Bank employees, not victim bankrobbery | 1116 | 150 | 13.4 | 1.76 ( 0.99 - 3.11 ) | .05 | 3.17 ( 2.09 - 4.82 )   | .00 |
| 4                                                          | Bank employees, victim bankrobbery     | 148  | 30  | 20.3 | 2.70 ( 1.38 - 5.29 ) | .00 | 4.88 ( 2.81 - 8.44 )   | .00 |
| 5                                                          | Psychiatric hospital employees         | 220  | 29  | 13.2 | 1.79 ( 0.91 - 3.50 ) | .09 | 3.23 ( 1.87 - 5.58 )   | .00 |
| 6                                                          | Trainees AT                            | 714  | 225 | 31.5 | 5.12 ( 2.89 - 9.10 ) | .00 | 9.25 ( 6.07 - 14.09 )  | .00 |
| 7                                                          | Soldiers, not deployed before          | 281  | 58  | 20.6 | 1.85 ( 0.98 - 3.49 ) | .06 | 3.33 ( 2.02 - 5.51 )   | .00 |
| 8                                                          | Soldiers, deployed before              | 241  | 44  | 18.3 | 1.74 ( 0.92 - 3.27 ) | .09 | 3.13 ( 1.91 - 5.15 )   | .00 |
| 9                                                          | Firefighters                           | 130  | 17  | 13.1 | 1.20 ( 0.58 - 2.48 ) | .63 | 2.16 ( 1.16 - 4.02 )   | .02 |
| 10                                                         | Social welfare                         | 85   | 20  | 23.5 | 3.56 ( 1.64 - 7.72 ) | .00 | 6.42 ( 3.28 - 12.57 )  | .00 |
| COMPOSITE VARIABLE: ANY MENTAL HEALTH PROBLEM <sup>1</sup> |                                        |      |     |      |                      |     |                        |     |
| 1                                                          | Police officers                        | 149  | 29  | 19.5 | 1                    |     |                        |     |
| 2                                                          | Police officers                        | 516  | 50  | 9.7  | 0.49 ( 0.29 - 0.82 ) | .01 | 1                      |     |

|                                          |      |     |      |      |                 |     |      |                  |     |
|------------------------------------------|------|-----|------|------|-----------------|-----|------|------------------|-----|
| 3 Bank employees, not victim bankrobbery | 1116 | 236 | 21.1 | 1.58 | ( 0.99 - 2.53 ) | .06 | 3.22 | ( 2.26 - 4.58 )  | .00 |
| 4 Bank employees, victim bankrobbery     | 148  | 49  | 33.1 | 2.78 | ( 1.59 - 4.87 ) | .00 | 5.66 | ( 3.55 - 9.03 )  | .00 |
| 5 Psychiatric hospital employees         | 220  | 52  | 23.6 | 1.84 | ( 1.06 - 3.18 ) | .03 | 3.75 | ( 2.39 - 5.89 )  | .00 |
| 6 Trainees AT                            | 714  | 333 | 46.6 | 4.80 | ( 2.97 - 7.75 ) | .00 | 9.78 | ( 6.81 - 14.04 ) | .00 |
| 7 Soldiers, not deployed before          | 281  | 70  | 24.9 | 1.32 | ( 0.77 - 2.28 ) | .31 | 2.70 | ( 1.73 - 4.20 )  | .00 |
| 8 Soldiers, deployed before              | 238  | 52  | 21.8 | 1.23 | ( 0.71 - 2.11 ) | .46 | 2.50 | ( 1.61 - 3.88 )  | .00 |
| 9 Firefighters                           | 128  | 25  | 19.5 | 1.11 | ( 0.60 - 2.05 ) | .73 | 2.27 | ( 1.34 - 3.85 )  | .00 |
| 10 Social welfare                        | 85   | 24  | 28.2 | 2.31 | ( 1.17 - 4.57 ) | .02 | 4.72 | ( 2.57 - 8.65 )  | .00 |

Adj. OR = Odds ratio adjusted for age, gender and education. 95% CI = 95% confidence interval.

<sup>1</sup> Anxiety and/or depression and/or hostility.

Due to missing data the number of respondents per groups differs a little on each SCL-90-R sub scale



**Police officers: a high risk group for the development of mental health disturbances? A cohort study**

|                                 |                                                                                                                                                                                                                                                                                                                                                                                                                                                                                            |
|---------------------------------|--------------------------------------------------------------------------------------------------------------------------------------------------------------------------------------------------------------------------------------------------------------------------------------------------------------------------------------------------------------------------------------------------------------------------------------------------------------------------------------------|
| Journal:                        | <i>BMJ Open</i>                                                                                                                                                                                                                                                                                                                                                                                                                                                                            |
| Manuscript ID:                  | bmjopen-2012-001720.R1                                                                                                                                                                                                                                                                                                                                                                                                                                                                     |
| Article Type:                   | Research                                                                                                                                                                                                                                                                                                                                                                                                                                                                                   |
| Date Submitted by the Author:   | 19-Nov-2012                                                                                                                                                                                                                                                                                                                                                                                                                                                                                |
| Complete List of Authors:       | Velden, Peter G.; Institute for Psychotrauma, ; Tilburg University, INTERVICT<br>Rademaker, Arthur; Dutch Ministry of Defence, Research Center Military Mental Healthcare<br>Vermetten, Eric; Dutch Ministry of Defence, Research Center Military Mental Healthcare<br>Portengen, Marie-anne; Occupational health services ARBOUNIE,<br>Yzermans, Joris; Netherlands Institute for Health Services Research,<br>Grievink, Linda; National Institute for Public Health and the Environment, |
| <b>Primary Subject Heading</b>: | Mental health                                                                                                                                                                                                                                                                                                                                                                                                                                                                              |
| Secondary Subject Heading:      | Occupational and environmental medicine                                                                                                                                                                                                                                                                                                                                                                                                                                                    |
| Keywords:                       | MENTAL HEALTH, PSYCHIATRY, OCCUPATIONAL & INDUSTRIAL MEDICINE                                                                                                                                                                                                                                                                                                                                                                                                                              |
|                                 |                                                                                                                                                                                                                                                                                                                                                                                                                                                                                            |

SCHOLARONE™  
Manuscripts

1  
2  
3 Police officers: a high risk group for the development of mental health disturbances? A  
4  
5 cohort study  
6  
7  
8  
9  
10

11 Peter. G. van der Velden (Ph.D)<sup>a,b,c</sup>  
12  
13

14 Arthur R. Rademaker (Ph.D)<sup>d</sup>  
15  
16

17 Eric Vermetten ( M.D. Ph.D.)<sup>d</sup>  
18  
19

20 Marie-Anne Portengen (M.D.)<sup>e</sup>  
21  
22

23 Joris C. Yzermans (Ph.D.)<sup>f</sup>  
24  
25

26 Linda Grievink (Ph.D.)<sup>g</sup>  
27  
28  
29  
30  
31  
32

33  
34 <sup>a</sup> Institute for Psychotrauma, Nienoord 5, Diemen, The Netherlands  
35

36  
37 <sup>b</sup> INTERVICT, Tilburg University, Tilburg, the Netherlands  
38  
39

40 <sup>c</sup> Arq Psychotrauma Expert Group, Diemen, The Netherlands  
41  
42

43 <sup>d</sup> Military Mental Health Research Center and University Medical Center Utrecht, Utrecht,  
44  
45 The Netherlands  
46  
47

48 <sup>e</sup> Occupational health services ARBOUNIE, Dordrecht, The Netherlands  
49  
50

51 <sup>f</sup> Netherlands Institute for Health Services Research, Utrecht, The Netherlands  
52  
53

54 <sup>g</sup> National Institute for Public Health and the Environment, Bilthoven, The Netherlands  
55  
56  
57  
58  
59  
60

**Keywords**

Police officers, Anxiety, Depression, Hostility, Comparative study

**Word count**

2925 (exc. Title page, abstract, references, "what this study adds", and tables)

For peer review only



**ABSTRACT****Objectives**

Policing is generally considered a high risk profession for the development of mental health problems, but this assumption lacks empirical evidence. Research question of the present study is to what extent mental health disturbances, such as (very) severe symptoms of anxiety, depression and hostility are more prevalent among police officers than among other occupational groups.

**Design**

Multi-comparative cross sectional study using the data of several cross sectional and longitudinal studies in the Netherlands.

**Participants**

Two samples of police officers (N=144, N=503), employees of banks (N=1113) and employees of banks who were robbed (N=148); employees of supermarkets (N=335), and a psychiatric hospital (N=219), employees of a governmental social welfare organization (N=76), employees who followed a training based on Rational-motive therapy (RET) to strengthen their assertiveness (N=710), soldiers before deployment (N=278) and before re-deployment (N=236), and firefighters (N=123). The numbers refer to respondents with complete data.

**Primary outcomes**

1  
2  
3 Prevalence of severe (sub clinical level) and very severe symptoms (clinical level) were  
4  
5 computed using the Dutch norm tables (80<sup>th</sup> percentile en 95<sup>th</sup> percentile respectively) of the  
6  
7 SCL-90-R. All comparisons were controlled for age, gender and education.  
8  
9

## 10 11 12 **Results**

13  
14 Multivariate logistic regression and analyses showed that the prevalence of clinical and sub  
15  
16 clinical levels of symptoms of anxiety, depression and hostility among police officers were  
17  
18 not significantly higher than among comparison groups. The same pattern was found for the  
19  
20 other SCL-90-R sub scales.  
21  
22  
23  
24  
25  
26

## 27 **Conclusions**

28  
29 We found no indications that self-reported mental health disturbances were more prevalent  
30  
31 among police officers than among groups of employees that are not considered high risk  
32  
33 groups, such as employees of banks, supermarkets, psychiatric hospital and soldiers before  
34  
35 deployment.  
36  
37  
38  
39  
40  
41  
42  
43  
44  
45  
46  
47  
48  
49  
50  
51  
52  
53  
54  
55  
56  
57  
58  
59  
60

1  
2  
3  
4  
5  
6 Police officers are commonly considered to be a high-risk group for the development of  
7  
8 mental health disturbances because of the various critical incidents and potential traumatic  
9  
10 events they encounter during their career. These so-called operational stressors, such as  
11  
12 witnessing the death of children, confrontations with victims of sexual harassment, serious  
13  
14 traffic accidents, suicide, and experiencing violence, might increase the risk of symptoms of  
15  
16 anxiety, hostility and fatigue. A (small) minority may develop mental disorders, such as  
17  
18 depression and PTSD<sup>1-4</sup>.  
19  
20  
21

22  
23 On the other hand, research in the past 20 years among police officers has shown  
24  
25 that organizational stressors such as conflicts, work load, and lack of support are more likely  
26  
27 to be adverse sources of stress than operational stressors. In other words, although police  
28  
29 officers are more frequently confronted with critical incidents than for example employees  
30  
31 of banks or supermarkets, organizational stressors -which are not specific for the police-  
32  
33 appear to have more impact on health and well-being than (daily) operational stressors<sup>2, 5-7</sup>.  
34  
35  
36

37 This may explain the outcomes of a study<sup>8</sup> in the U.K. which ranked 26 professions  
38  
39 according to their scores on general psychological well-being and physical health. The rank  
40  
41 orders for police officers was 9<sup>th</sup> and 11<sup>th</sup>, with the first place denoting the professional  
42  
43 occupation with the highest absolute mean score of health problems . Teachers, a  
44  
45 professional group that is not typically associated with frequent exposure to potential  
46  
47 traumatic stressors, ranked 2<sup>nd</sup> on both well-being and physical health. Similarly, an earlier  
48  
49 smaller Australian comparative study reported that police officers showed significantly more  
50  
51 favorable levels of well-being and psychological distress than school teachers and the  
52  
53 general population (i.e. Australian norm scores)<sup>9</sup>.  
54  
55  
56  
57  
58  
59  
60

1  
2  
3 However, to the best of our knowledge there is no, peer reviewed- published multi-  
4 comparative study that a.) statistically examined differences in symptom levels between the  
5 police and several other occupational groups while also controlling for confounding factors  
6 such as age, gender and education, and b.) focused on specific mental health disturbances  
7 including sub clinical and clinically relevant levels of symptoms of anxiety, depression, and  
8 hostility. Aim of this comparative study was to explore self-reported mental health of police  
9 officers compared to members of other professions, to investigate whether there are  
10 empirically based indications that policing may be considered a high risk profession for the  
11 development of mental health disturbances.  
12  
13  
14  
15  
16  
17  
18  
19  
20  
21  
22  
23  
24  
25  
26  
27  
28

## 29 **METHODS**

### 30 **Samples and procedures**

31  
32  
33  
34  
35  
36 In the present study we compared police officers with nine other occupational groups. The  
37 presented numbers of each group refer to the number of respondents of each study group  
38 with complete data.  
39  
40  
41  
42

43 We compared the health of two samples of officers ( $N^{\text{group1}}=144$ ,  $N^{\text{group2}}=503$ ) with other  
44 occupational groups. Group 1 consisted of police officers working in the eastern part of the  
45 Netherlands (region department North and East Gelderland, response=60%)<sup>10</sup>. This group  
46 was originally selected in 2002 to provide reference data for group 2 to examine the  
47 consequences of the disaster and other critical incidents on health. Group 2 consisted of  
48 police officers who were involved in the Enschede fireworks disaster and its aftermath (The  
49 Netherlands, 2000), and participated in a survey 4 years post-event (2004, response=  
50  
51  
52  
53  
54  
55  
56  
57  
58  
59  
60

80.5%)<sup>5</sup>. At that time, only one officer (0,2%) suffered from probable disaster-related PTSD.

These studies were conducted on behalf of the Dutch Ministry of Health, Welfare and Sports.

We compared the two groups of officers with the following non-clinical groups of employees participating in various Dutch studies on health and critical incidents at work. Furthermore, data from group 6 was obtained to evaluate a training program (see below). The year of data gathering is presented between brackets and funding for each study will be described. This study is a clear example of a data-sharing research project of the researchers involved.

- Group 3 and 4 (1991): A nationwide sample of 1257 front office employees of savings banks , of whom 11.5% experienced one of more bank robberies ( $N^{\text{group3}}=1113$  and  $N^{\text{group4}}=144$  respectively, response=71%)<sup>11</sup>. This cross sectional study was conducted on behalf of a Savings Banks Association, The Netherlands.
- Group 5 (1996): A random sample of mental health care professionals, i.e. nurses and therapists of a psychiatric hospital ( $N=219$ , response=70%)<sup>12</sup>. This cross sectional study was conducted on behalf of a Psychiatric Hospital.
- Group 6 (1997-1998): Random sample of employees of various organizations, before participating in a RET training ( $N=710$ , response=74%)<sup>13</sup> aimed at improving their assertiveness and well-being. The cross sectional study was conducted on behalf of a training institute in the Netherlands.
- Group 7 and 8 (2005-2007): Sample of 524 soldiers from a larger prospective cohort study on stress-related disorders who were assessed prior to a 4-month deployment to Afghanistan of whom 241 were deployed before ( $N^{\text{group7}}=278$  and  $N^{\text{group8}}=236$

- 1  
2  
3 respectively, response= 82.5%)<sup>14</sup>, conducted on behalf of the Dutch Ministry of  
4  
5 Defense.  
6  
7  
8 - Group 9 (2002): Firefighters from the Utrecht firefighters department (N=123,  
9  
10 response=48%)<sup>15</sup>. This cross sectional study was conducted on behalf of the Dutch  
11  
12 Ministry of Health, Welfare and Sport.  
13  
14 - Group 10 (1995): Employees of a governmental social welfare organization in the  
15  
16 Western part of the Netherlands, who had direct contact with clients of the  
17  
18 organization (N=76, response=65%)<sup>16</sup>. This cross sectional study was conducted to  
19  
20 finish the Occupational Physician education program of the researcher.  
21  
22  
23 - Groups 11 (1996): A nationwide random sample of employees of local supermarkets  
24  
25 (N=335, response=88%)<sup>17</sup>. This cross sectional study was conducted on behalf of a  
26  
27 large supermarket organization in the Netherlands.  
28  
29  
30

31 All participants in the studies mentioned above, received written information about the  
32  
33 scientific study aims. None of the funding organizations mentioned above were involved in  
34  
35 the present study design, analyses and manuscript.  
36  
37  
38  
39

#### 40 **Measures**

41  
42 Besides questions regarding age, gender and education, respondents of all groups, except  
43  
44 group 11, completed the total Symptom Check List Revised (SCL-90-R)<sup>18,19</sup>. This instrument  
45  
46 uses a five-point Likert scale (from 1, 'not at all' to 5, 'extremely') and assesses symptoms  
47  
48 over the previous 7 days. The validity and reliability of the Dutch SCL-90-R has proven to be  
49  
50 satisfactory<sup>19</sup>. The Dutch cut-off scores<sup>19</sup> from 1986 for males and females of a normal  
51  
52 population were used to identify participants with a.) at least severe symptoms of anxiety,  
53  
54 depression, sleeping problems and hostility (80<sup>th</sup> percentile,) and b.) with very severe  
55  
56  
57  
58  
59  
60

1  
2  
3 symptoms (95<sup>th</sup> percentile) that are clinically relevant and may be indicative for a mental  
4  
5 disorder. Group 11 was administered a brief scale consisting of 17 random items of the SCL-  
6  
7 90-R. Our control analyses showed that the sum score of the 17 items correlated highly with  
8  
9 the total score of the SCL-90-R across several samples ( $r > .95$ ). Education levels differed  
10  
11 slightly across studies. We therefore made a distinction between those with high education  
12  
13 levels (university and higher professional education) versus low to medium level (all other  
14  
15 levels).  
16  
17  
18  
19  
20  
21

### 22 **Data analyses**

23  
24 Differences in demographics were assessed using chi-square statistics. Multivariate logistic  
25  
26 regression analyses were used to examine to what extent very severe symptoms and severe  
27  
28 symptoms were more prevalent among police officers, while controlling for age, gender and  
29  
30 education level. Two composite variables on mental health were computed. The first  
31  
32 composite variable was based on whether respondents reported very severe anxiety, very  
33  
34 severe depression and/or very severe hostility symptoms or did not report very severe  
35  
36 symptoms on any of these three scales. A similar composite variable was based on severe  
37  
38 symptoms. The multivariate logistic regression analyses were repeated with these composite  
39  
40 variables as dependent variables, and group membership, age, gender and education as  
41  
42 independent variables (predictors). ANOVA was used to examine differences in mean scores  
43  
44 on the sum score of 17 items between group 1, 2 and 11 while controlling for the same  
45  
46 possible confounding factors. SPSS version 18.0 was used to perform the analyses.  
47  
48  
49  
50  
51  
52  
53  
54

### 55 **RESULTS**

1  
2  
3 The demographics are shown in Table 1. Chi-squares statistics indicated that study groups  
4  
5 differed in gender ( $\chi^2=897.6$ ,  $df=9$ ,  $p < .001$ ), age ( $\chi^2=798$ ,  $df=18$ ,  $p < .001$ ) and educational  
6  
7 level ( $\chi^2=852.4$ ,  $df=9$ ,  $p < .001$ ).  
8  
9

10 The prevalence's of very severe symptoms (95<sup>th</sup> percentile) are presented (except  
11  
12 group 11) in Table 2, as well as the adjusted Odd Ratios (Adj. OR) and the 95% confidence  
13  
14 intervals (95% CI). In Table 3, similar statistics are presented with respect to severe  
15  
16 symptoms (80<sup>th</sup> percentile). A table of the bivariate OR's is available on request (see  
17  
18 appendix A)  
19  
20

21 Results clearly show that both groups of police officers are relatively healthy: the  
22  
23 proportion of officers with very severe symptoms of anxiety, depression, and hostility is  
24  
25 extremely low ( $\leq 1.4\%$ ). Compared to all other study groups, police officers had similar or  
26  
27 lower prevalence of clinical levels of mental health problems according to the adjusted odd  
28  
29 ratios. When using a less strict criterion of sub clinical levels, i.e. at least severe symptoms  
30  
31 instead of very severe symptoms according to the norm tables, the groups of officers still  
32  
33 ranked as groups with relatively low prevalence rates. Furthermore, the proportion of  
34  
35 officers with severe or very severe symptoms of anxiety or depression or hostility (i.e.  
36  
37 composite variables), was not significantly higher than among other groups. Additional  
38  
39 analyses showed similar patterns with respect to the other sub scales of the SCL-90-R (data  
40  
41 not shown).  
42  
43  
44  
45  
46

47 The results of ANOVA ( $F^{\text{main}}=25.5$ ,  $df=2$ ,  $p < .001$ ) and post hoc analyses reveal the  
48  
49 2004 sample of police officers to exhibit significantly lower mean scores on the 17 item sum  
50  
51 score than employees of supermarkets, while the 2002 sample did not differ significantly  
52  
53 from supermarket employees (Police<sup>2002</sup>:  $M=20.7$ ,  $SD=5.9$ ; Police<sup>2004</sup>:  $M=18.9$ ,  $SD=4.37$ ;  
54  
55 Super market:  $M=22.6$ ,  $SD=7.28$ ).  
56  
57  
58  
59  
60



## DISCUSSION

We found no indications that sub clinical mental health problems, i.e. severe symptoms, were more prevalent amongst police officers than amongst other occupational groups in our comparative study. The same pattern was observed with respect to very severe symptoms, i.e. a level of self-reported symptoms that may be indicative of the presence of mental disorders such as generalized anxiety disorder or major depressive disorder. Surprisingly, findings showed that officers in our comparative study were as healthy as study groups that are not considered high risk professions, such as employees of banks (not victimized by robberies), supermarket employees, mental health care professionals and soldiers before deployment. Moreover, they strongly differed from employees participating in a RET training because of mental health problems that were associated with a lack of assertiveness. Although we are not aware of a similar multi-comparative study, these findings appear to be in line with the outcomes of a Dutch study on burnout among officers showing that officers had lower levels of emotional exhaustion than one large reference group consisting of various occupations<sup>20</sup>, a Norwegian study<sup>1</sup> showing that officers exhibited lower levels of emotional exhaustion (but higher levels of depersonalization) than physicians, and the outcomes of the aforementioned studies<sup>8,9</sup>. However, these studies did not control of adjust for the possible confounding effects of demographics in contrast to our study.

How can these findings be explained? In the Dutch situation police officers follow a rigorous selection process: about 90% of those applying to the officer training program is rejected (personal communication Dr. Annika Smit, Dutch Police Academy). Moreover, officers are trained to deal and cope with critical incidents and as a consequence may be highly resilient to mental health problems<sup>21</sup>. This may explain why bank employees (not

1  
2  
3 selected to cope with severe incidents nor trained as rigorously as police officers), who were  
4  
5 confronted with bank robberies reported significantly more (severe and very severe) mental  
6  
7 health disturbances.  
8

9  
10 Interestingly, in an older prospective study among police officers involved as body  
11  
12 handlers in a disaster, no increases in health problems compared with pre-disaster levels  
13  
14 were observed<sup>22</sup>. These findings seriously question the generally held belief that policing is a  
15  
16 high risk profession with respect to mental health: is it perhaps a (partial) myth? Either way,  
17  
18 it reminds us of the debate on suicide among officers that once (in fact) has been described  
19  
20 as an epidemic<sup>23</sup>. However, the critical review on suicide among officers of Hem and  
21  
22 colleagues<sup>23</sup> clearly demonstrated that no evidence of an elevated suicide rate among  
23  
24 officers actually exists and that previous research had serious methodological shortcomings.  
25  
26  
27

28  
29 Despite the strength of our study, i.e. multiple comparison groups and controlling for  
30  
31 age, gender and education, some possible limitations and characteristics should be  
32  
33 discussed. First, although very high scores on the SCL-90-R (very severe symptoms) may be  
34  
35 indicative of a mental disorder, we did not conduct clinical interviews to examine the  
36  
37 prevalence of mental disorders such as generalized anxiety, major depression and PTSD  
38  
39 across samples. Very severe symptoms are considered to be clinically relevant. According to  
40  
41 the Dutch norm tables<sup>19</sup> the mean scores of a norm group of psychiatric patients on the  
42  
43 subscales anxiety and depression were 26.0 (sd=9.9) and 41.9 (sd=14.8) respectively. In our  
44  
45 total sample the mean scores of those with very severe anxiety and depression symptoms  
46  
47 were 27.7 (sd=5.2) and 43.3 (sd=8.1) respectively. Therefore, it is not very likely that the  
48  
49 prevalence rates obtained from clinician rated instruments would be (much) higher than the  
50  
51 prevalence rates obtained by self-report measures such as the SCL-90-R<sup>24</sup>.  
52  
53  
54  
55  
56  
57  
58  
59  
60

1  
2  
3 Second, we were not able to compare the prevalence of PTSD across our study  
4  
5 samples. Therefore, it is possible that the prevalence of PTSD among police officers is higher  
6  
7 than among the other study groups. However, given the marked overlap of PTSD symptoms  
8  
9 with other disorders and the typical comorbidity rates of PTSD with for instance  
10  
11 depression<sup>25,26</sup>, it is unlikely that police officers with PTSD, did not suffer from other severe  
12  
13 mental health disturbances. Indeed, a large study among UK military personnel (N=10069)<sup>27</sup>  
14  
15 showed that 344 out of the 394 PTSD cases (87.3%) reported severe mental health  
16  
17 problems, i.e. were GHQ cases (high scores on the General Health Questionnaire). Only a  
18  
19 small group of PTSD cases (N=50, 12.7%) were not identified as being a GHQ case (personal  
20  
21 communication prof. Roberto Rona). Control analyses among another sample (N=67) of  
22  
23 Dutch employees seeking treatment at the Institute for Psychotrauma for (probable) PTSD  
24  
25 following various traumatic events, showed similar results. In total, 86.6% (N=58) of the  
26  
27 (probable) PTSD cases (N=67, Scores on the Impact of Event Scale (IES) of 35 or more<sup>28</sup>) also  
28  
29 reported very severe mental health problems according to our composite variable of very  
30  
31 severe symptoms. These findings are in line with previous research<sup>28,30</sup>, demonstrating that  
32  
33 PTSD and SCL-90-R scores are strongly associated. Thus, an increased prevalence rate for  
34  
35 PTSD in the absence of marked mental health problems would be highly unlikely.  
36  
37  
38  
39  
40  
41  
42

43 Third, the two groups of officers were not drawn from national samples of officers.  
44  
45 Group 1 was obtained in the eastern part of the Netherlands, but group 2 consisted of  
46  
47 officers from several regions in the Netherlands (mainly east, mid and west). We have no  
48  
49 data on the non-response of group 1. Although both groups did not differ in prevalence rates  
50  
51 of very severe anxiety, depression and hostility symptoms (i.e. clinical level of symptoms),  
52  
53 significant differences were found in the prevalence of severe depression symptoms (80<sup>th</sup>  
54  
55 percentile). This may reflect the normal variety of the prevalence of symptoms among sub  
56  
57  
58  
59  
60

1  
2  
3 samples within one occupational group. In addition, table 2 showed that females in our  
4  
5 study less often had severe symptoms than males (although the prevalence of very severe  
6  
7 symptoms did not differ between both sub groups) while in the general population the  
8  
9 opposite is found<sup>19</sup>. However, our study samples do not reflect the general population (see  
10  
11 table 1). We used the Dutch norm tables for males and females: the cut-offs scores for  
12  
13 females are slightly higher than for males to enable such comparisons<sup>19</sup>.  
14  
15

16  
17 Finally, one could hypothesize that the data of our study groups were not all obtained  
18  
19 very recently and that for instance the current prevalence of mental health problems among  
20  
21 police officers is (much) higher. The data were in fact obtained in the period 1991-2007. It is  
22  
23 possible in principle that the stability of the prevalence of assessed clinical and sub clinical  
24  
25 symptoms varied across the study groups during this period. Therefore we cannot rule out  
26  
27 the possibility that for instance mental health problems among police officers increased over  
28  
29 these years, while those of bank employees decreased and those of soldiers remained  
30  
31 stable. Unfortunately, we are not aware of any study assessing and demonstrating  
32  
33 differences in trajectories of prevalence between the study groups over a period of 16 years.  
34  
35 However, epidemiological studies among the general population examining 12-months  
36  
37 prevalence of mental disorders may shed more light on this issue. Kessler and colleagues<sup>31</sup>  
38  
39 showed that the 12-months prevalence of any mental disorder was more or less stable over  
40  
41 a 10-years period, i.e. 29.5% and 26.2% respectively. With respect to the Netherlands, the  
42  
43 NEMESIS study<sup>32</sup> showed similar outcomes: in contrast to the expectations of mental health  
44  
45 professional the 12-months prevalence remained stable at about 17%<sup>33</sup> in a similar period.  
46  
47 These important results suggest that, although the studies were conducted among the  
48  
49 general population, it is more likely that the prevalence of assessed mental health problems  
50  
51 was relatively stable and did not differ significantly across occupational groups over time.  
52  
53  
54  
55  
56  
57  
58  
59  
60

1  
2  
3 Participants of all eleven study groups were inhabitants of the Netherlands.  
4  
5 Therefore, future research is warranted to examine to what extent our findings can be  
6  
7 generalized to countries with different political, social, medical and legal systems, and  
8  
9 selection and training procedures of officers. We were not able to control for other  
10  
11 influential factors such as organizational characteristics . Finally, we did not examine the  
12  
13 extent of substance use such as the consumption of alcohol and smoking. Although the  
14  
15 outcomes of Sterud and colleagues<sup>34</sup> did not support the notion of a strong relationship  
16  
17 between occupational stress and alcohol use in police officers, it is unclear whether alcohol  
18  
19 use differs from the other groups in our study.  
20  
21  
22  
23  
24  
25

## 26 CONCLUSIONS

27  
28 Despite these limitations, the present study demonstrates that, although policing is generally  
29  
30 viewed as a high risk profession, mental health disturbances are not more prevalent in police  
31  
32 officers as compared to various other occupational cohorts in our study. Several of these  
33  
34 groups such as bank employees (not being robbed) and supermarket employees, as well as  
35  
36 soldiers before deployment are typically not considered to be “high risk professions”. These  
37  
38 findings suggest that the positive effects on the mental health of police officers of the  
39  
40 selection process, self-selection and resilience, given the amount of potential stressful and  
41  
42 traumatic events they encounter during their career, should not be underestimated.  
43  
44  
45  
46  
47  
48  
49  
50  
51  
52  
53  
54  
55  
56  
57  
58  
59  
60

## Abstract

### Article focus

- It is generally assumed that police officers, due to the specific nature of their work, are at (high) risk for the development of mental health problems.
- The results of the very limited number of studies that compared the mental health of officers with one or two comparison groups, suggest that this assumption needs further proof.
- To assess this assumption, clinical as well as sub clinical levels of mental health problems of officers were compared with 9 other occupational groups while controlling for demographics.

### Key messages

- In contrast to this generally held belief, officers did not report more (serious) mental health problems than any of the other examined groups in our multi-comparative study.
- The protective effects of self-selection, the resilience of police officers and a rigorous selection-process of recruits, might be an explanation of the relatively low prevalence rates of mental health disturbances.

### Strengths and limitations

- To the best of our knowledge, this is the first multi-comparative study examining to what extent clinical as well as sub clinical levels of symptoms of anxiety, depression and hostility are more prevalent among police officers than among people in other occupations, while controlling for demographics.
- We did not conduct clinical interviews

### **Acknowledgements**

We would like to express our gratitude to Professor RJ Rona (Institute of Psychiatry, King's College London) for his courteous help, i.e. providing us the cross tabulation data on PTSD and GHQ cases among UK military. In addition, we like to thank M Bosmans (Msc), and A Pemberton (PhD, INTERVICT, Tilburg University) for their help en support, and A Smit (PhD, Dutch Police Academy) for providing information on the selection process of officers.

### **Competing interests**

None.

## References

1. **Berg AM**, Hem E, Lau B, et al. An exploration of job stress and health in the Norwegian police service: cross sectional study. *J Occup Med Toxicol* 2006; **1**:26.
2. **Maguen S**, Metzler TJ, McCaslin SE, et al. Routine work environment stress and PTSD symptoms in police officers. *J Nerv and Ment Dis* 2009; **197**: 754–760.
3. **Stephens C**, Miller I. Traumatic experiences and posttraumatic stress disorder in the New Zealand police. *Policing* 1998; **21**: 178–191.
4. **Hartley TA**, Violanti JM, Fekedulegn D, et al. Associations between major life events, traumatic incidents, and depression among Buffalo police officers. *Int J Emerg Ment Health* 2007; **9**: 25–35.
5. **Velden PG van der**, Kleber RJ, Grievink L, et al. Confrontations with aggression and mental health problems in police officers: The role of organizational stressors, life-events and previous mental health problems. *Psychol Trauma: Theory, Res, Practice, Policy* 2010; **2**: 135–144.
6. **Liberman AM**, Best SR, Metzler TJ, et al. Routine occupational stress and psychological distress in police. *Policing* 2002; **25**: 421–439.
7. **Huddleston L**, Stephens C, Paton D. An evaluation of traumatic and organizational experiences on the psychological health of New Zealand police recruits. *Work* 2007; **28**: 199–207.
8. **Johnson S**, Cooper C, Cartwright S, et al. The experience of work-related stress across occupations. *J Manag Psychol* 2005; **20**: 178-187.



- 1  
2  
3 9. **Hart PM**, Wearing AJ, Headey B. Police stress and well-being: Integrating personality,  
4  
5 coping and daily work experiences. *J Occup Organ Psychol* 1995; **68**: 133–165.  
6
- 7  
8 10. **Velden PG van der**, Grievink L, Dusseldorp A, et al. *Health victims Enschede fireworks*  
9  
10 *disaster* (In Dutch). Instituut voor Psychotrauma (IvP)/ Rijksinstituut voor  
11  
12 Volksgezondheid en Milieu (RIVM), 2002.  
13
- 14  
15 11. **Velden PG van der**, Burg S van der, Steinmetz CHD, et al. *Victim of bank robberies* (in  
16  
17 Dutch). Bohn Stafleu Van Loghem, 1992.  
18
- 19  
20 12. **Velden PG van der**, Herpers TMM. Aggression in a psychiatric hospital (in Dutch).  
21  
22 *Gedrag & Gezondheid* 1994; **5**: 209-218.  
23
- 24  
25 13. **Velden PG van der**, Kleber RJ, Oostrom I van. *StressMonitor manual* (in Dutch).  
26  
27 Instituut voor Psychotrauma/S&N, 2000.  
28
- 29  
30 14. **Rademaker AR**, van Zuiden M, Vermetten E, et al. Type D personality and the  
31  
32 development of PTSD symptoms: a prospective study. *J Abnorm Psychol* 2011; **120**  
33  
34 (2), 299-307.  
35
- 36  
37 15. **Velden PG van der**, Christiaanse B, Kleber RJ, et al. The effects of disaster exposure  
38  
39 and post-disaster critical incidents on intrusions, avoidance and health problems  
40  
41 among firefighters: A comparative study. *Stress, Trauma Crisis: International J* 2006;  
42  
43 **9**: 73–93.  
44
- 45  
46 16. **Portengen MAF**. *Aggression and violence in social welfare* (in Dutch). Corvu / AMC  
47  
48 Amsterdam, 1995.  
49
- 50  
51 17. **Velden PG van der**. *Investigation of unsafe situations in supermarkets* (in Dutch).  
52  
53 Instituut voor Psychotrauma, 1996.  
54  
55  
56  
57  
58  
59  
60

- 1  
2  
3  
4  
5  
6  
7  
8  
9  
10  
11  
12  
13  
14  
15  
16  
17  
18  
19  
20  
21  
22  
23  
24  
25  
26  
27  
28  
29  
30  
31  
32  
33  
34  
35  
36  
37  
38  
39  
40  
41  
42  
43  
44  
45  
46  
47  
48  
49  
50  
51  
52  
53  
54  
55  
56  
57  
58  
59  
60
18. **Derogatis LR**. *SCL-90-R: administration, scoring and procedures manual-I for the R(evised) version*. Johns Hopkins University School of Medicine, Clinical Psychometrics Research Unit, 1977.
  19. **Arrindell WA**, Ettema JHM. *SCL-90-R Manual* (in Dutch). Swets & Zeitlinger/ Swets Test publishers, 1986 & 2003.
  20. **Kop N**, Euwema M, Schaufeli W. Burnout, job stress and violent behavior among Dutch police officers. *Work & Stress* 1999; **13**: 326-340.
  21. **Galatzer-Levy IR**, Madan A, Neylan TC, et al. Peritraumatic and trait dissociation differentiate police officers with resilient versus symptomatic trajectories of posttraumatic stress symptoms. *J Trauma Stress* 2011; **24**: 557-65.
  22. **Alexander DA**, Wells A. Reactions of police officers to body handling after a major disaster: a before and after comparison. *Br J Psychiatry* 1991; **159**: 547-555.
  23. **Hem E**, Berg AM, Ekeberg AO. Suicide in police--a critical review. *Suicide Life Threat Behav* 2001; **31**: 224-33.
  24. **Engelhard IM**, van den Hout MA, et al. Deployment-related stress and trauma in Dutch soldiers returning from Iraq. Prospective study. *Br J Psychiatry* 2007; **191**: 140-145.
  25. **Deering CG**, Glover SG, Ready D, et al. Unique patterns of comorbidity in posttraumatic stress disorder from different sources of trauma. *Compr Psychiatry* 1996; **37**: 336-346.
  26. **Blanchard EB**, Buckley TC, Hickling EJ, Taylor AE. Posttraumatic stress disorder and comorbid major depression: is the correlation an illusion? *J Anxiety Disord* 1998; **12**: 21-37.

- 1  
2  
3 27. **Rona RJ**, Jones M, Iversen A, et al. The impact of posttraumatic stress disorder on  
4  
5 impairment in the UK military at the time of the Iraq war. *J Psychiatry Res* 2009; **43**:  
6  
7 649-55.  
8  
9
- 10 28. **Neal LA**, Busutti W, Rollins JI, et al. convergent validity of measures of Post-Traumatic  
11  
12 Stress Disorder in a mixed military and civilian population. *J Trauma Stress* 1994; **7**:  
13  
14 447-455.  
15  
16
- 17 29. **Saunders BE**, Mandoki Arata C, Kilpatrick D. Development of a crime-related Post-  
18  
19 Traumatic Stress Disorder scale for women within the symptom checklist-90-revised.  
20  
21 *J Trauma Stress* 1990; **3**: 439-448.  
22  
23
- 24 30. **Weathers FW**, Litz BT, Keane TM, et al. The utility of the SCL-90-R for the diagnosis of  
25  
26 war-zone related Posttraumatic Stress Disorder. *J Trauma Stress* 1996; **9**: 111-128.  
27  
28
- 29 31. **Kessler RC**, Chiu WT, Demler O, Walters EE. Prevalence, severity, and comorbidity of  
30  
31 12-month DSM-IV disorders in the National Comorbidity Survey Replication. *Arch Gen*  
32  
33 *Psychiatry* 2005; **62**: 617-627.  
34  
35
- 36 32. **Vollebergh WAM**, Iedema J, Bijl RV, Graaf R de, Smit F, Ormel J. The structure and  
37  
38 stability of common mental disorders: the Nemesis-study. *Arch Gen Psychiatry* 2001;  
39  
40 **58**: 597-603.  
41  
42
- 43 33. **Graaf R de**, Have M ten, Dorsselaer S van. De psychische gezondheid van de  
44  
45 Nederlandse bevolking NEMESIS-2: Opzet en eerste resultaten [The mental health of  
46  
47 the Dutch population NEMESIS-2: Design and first results. In Dutch]. Utrecht, Trimbos.  
48  
49
- 50 34. **Sterud T**, Hem E, Ekeberg O, et al. Occupational stress and alcohol use: a study of two  
51  
52 nationwide samples of operational police and ambulance, personnel in Norway. *Stud*  
53  
54 *Alcohol Drugs* 2007; **68** (6):896-904.  
55  
56  
57  
58  
59  
60

1  
2  
3  
4  
5  
6  
7  
8  
9  
10  
11  
12  
13  
14  
15  
16  
17  
18  
19  
20  
21  
22  
23  
24  
25  
26  
27  
28  
29  
30  
31  
32  
33  
34  
35  
36  
37  
38  
39  
40  
41  
42  
43  
44  
45  
46  
47  
48  
49  
50  
51  
52  
53  
54  
55  
56  
57  
58  
59  
60

For peer review only

Table 1 Gender, age and education level of study groups<sup>1</sup>

|                                      | N    | Gender     |              | Age (years) |            |            | Education       |           |
|--------------------------------------|------|------------|--------------|-------------|------------|------------|-----------------|-----------|
|                                      |      | males<br>% | females<br>% | 18-30<br>%  | 31-45<br>% | 46-65<br>% | low-medium<br>% | high<br>% |
| 1 Police officers                    | 144  | 86.1       | 13.9         | 4.9         | 47.9       | 47.2       | 96.5            | 3.5       |
| 2 Police officers                    | 503  | 88.7       | 11.3         | 6.0         | 56.5       | 37.6       | 91.7            | 8.3       |
| 3 Bank employees, not victim robbery | 1113 | 34.1       | 65.9         | 48.7        | 38.3       | 13.0       | 81.0            | 19.0      |
| 4 Bank employees, victim robbery     | 148  | 47.3       | 52.7         | 37.8        | 44.6       | 17.6       | 79.1            | 20.9      |
| 5 Psychiatric hospital employees     | 219  | 37.9       | 62.1         | 41.6        | 47.5       | 11.0       | 61.6            | 38.4      |
| 6 Trainees AT                        | 710  | 68.2       | 31.8         | 29.0        | 57.9       | 13.1       | 33.8            | 66.2      |
| 7 Soldiers, not deployed before      | 278  | 87.8       | 12.2         | 81.3        | 14.7       | 4.0        | 88.8            | 11.2      |
| 8 Soldiers, deployed before          | 236  | 94.5       | 5.5          | 43.6        | 43.2       | 13.1       | 85.2            | 14.8      |
| 9 Firefighters                       | 123  | 96.7       | 3.3          | 17.1        | 39.0       | 43.9       | 94.3            | 5.7       |
| 10 Social welfare                    | 76   | 40.8       | 59.2         | 15.8        | 50.0       | 34.2       | 42.1            | 57.9      |
| 11 Supermarkets                      | 335  | 56.1       | 43.9         | 100         | -          | -          | 86.6            | 13.4      |
| Total                                | 3885 | 61.5       | 38.5         | 41.9        | 40.9       | 17.2       | 74.1            | 25.9      |

<sup>1</sup> Demographic characteristics of respondents with complete data

Table 2 Differences in prevalence of severe anxiety, depression and/or hostility symptoms (scores 80<sup>th</sup> centile) between study groups (N=3885).

|                                        | Severe Anxiety Symptoms |      |      |               |     |       |               |     | Severe Depression Symptoms |      |              |              |     |       |               |     |
|----------------------------------------|-------------------------|------|------|---------------|-----|-------|---------------|-----|----------------------------|------|--------------|--------------|-----|-------|---------------|-----|
|                                        | Symptoms                |      | Adj. |               |     | Adj.  |               |     | Symptoms                   |      | Adj.         |              |     | Adj.  |               |     |
|                                        | N                       | %    | OR   | 95 C.I.       | p   | OR    | 95 C.I.       | p   | N                          | %    | OR           | 95 C.I.      | p   | OR    | 95 C.I.       | p   |
| <b>Groups</b>                          |                         |      |      |               |     |       |               |     |                            |      |              |              |     |       |               |     |
| Police officers 1 (Ref.)               | 9                       | 6.2  | 1    |               |     |       |               | 17  | 11.8                       | 1    |              |              |     |       |               |     |
| Police officers 2 (Ref. second column) | 17                      | 3.4  | 0.54 | 0.24 to 1.24  | .15 | 1     |               | 26  | 5.2                        | 0.41 | 0.22 to 0.79 | .01          |     |       |               |     |
| Bank empl., not victim robbery         | 80                      | 7.2  | 1.52 | 0.73 to 3.17  | .26 | 2.82  | 1.61 to 4.92  | .00 | 134                        | 12.0 | 1.26         | 0.72 to 2.20 | .41 | 3.10  | 1.97 to 4.89  | .00 |
| Bank empl., victim robbery             | 32                      | 21.6 | 5.24 | 2.37 to 11.59 | .00 | 9.71  | 5.14 to 18.35 | .00 | 31                         | 20.9 | 2.35         | 1.22 to 4.52 | .01 | 5.76  | 3.25 to 10.19 | .00 |
| Psychiatric hospital empl.             | 22                      | 10.0 | 2.32 | 1.01 to 5.30  | .05 | 4.31  | 2.19 to 8.48  | .00 | 36                         | 16.4 | 1.82         | 0.96 to 3.46 | .07 | 4.50  | 2.59 to 7.82  | .00 |
| Trainees AT                            | 161                     | 22.7 | 5.98 | 2.89 to 12.35 | .00 | 11.27 | 6.53 to 19.44 | .00 | 257                        | 36.2 | 4.83         | 2.77 to 8.44 | .00 | 11.98 | 7.62 to 18.82 | .00 |
| Soldiers, not deployed before          | 17                      | 6.1  | 1.02 | 0.43 to 2.42  | .97 | 1.91  | 0.93 to 3.93  | .08 | 20                         | 7.2  | 0.60         | 0.29 to 1.21 | .15 | 1.47  | 0.78 to 2.75  | .23 |
| Soldiers, deployed before              | 12                      | 5.1  | 0.85 | 0.34 to 2.09  | .72 | 1.58  | 0.74 to 3.41  | .24 | 18                         | 7.6  | 0.63         | 0.31 to 1.29 | .21 | 1.56  | 0.83 to 2.92  | .17 |
| Firefighters                           | 5                       | 4.1  | 0.62 | 0.20 to 1.89  | .40 | 1.14  | 0.41 to 3.14  | .81 | 16                         | 13.0 | 1.08         | 0.52 to 2.24 | .84 | 2.60  | 1.35 to 5.03  | .00 |
| Social welfare                         | 13                      | 17.1 | 4.32 | 1.72 to 10.88 | .00 | 8.04  | 3.64 to 17.77 | .00 | 17                         | 22.4 | 2.56         | 1.20 to 5.47 | .02 | 6.25  | 3.14 to 12.45 | .00 |
| <b>Education</b>                       |                         |      |      |               |     |       |               |     |                            |      |              |              |     |       |               |     |
| Low-medium (Ref.)                      | 231                     | 8.9  | 1    |               |     | 1     |               |     | 336                        | 13.0 | 1            |              |     | 1     |               |     |
| High                                   | 137                     | 14.3 | 0.77 | 0.59 to 1.01  | .06 | 0.75  | 0.57 to 0.98  | .03 | 236                        | 24.6 | 1.00         | 0.80 to 1.26 | .99 | 0.99  | 0.79 to 1.24  | .90 |
| <b>Age</b>                             |                         |      |      |               |     |       |               |     |                            |      |              |              |     |       |               |     |
| 18-30 (Ref.)                           | 127                     | 9.8  | 1    |               |     | 1     |               |     | 195                        | 15.1 | 1            |              |     | 1     |               |     |
| 31-35                                  | 168                     | 10.6 | 0.85 | 0.60 to 1.21  | .36 | 0.83  | 0.58 to 1.18  | .29 | 266                        | 16.7 | 0.86         | 0.64 to 1.15 | .31 | 0.81  | 0.60 to 1.10  | .17 |
| 46-65                                  | 73                      | 10.9 | 0.73 | 0.54 to 1.00  | .05 | 0.72  | 0.52 to 0.99  | .04 | 111                        | 16.6 | 0.76         | 0.58 to 0.99 | .04 | 0.72  | 0.55 to 0.94  | .02 |
| <b>Gender</b>                          |                         |      |      |               |     |       |               |     |                            |      |              |              |     |       |               |     |
| Males (Ref.)                           | 240                     | 10.9 | 1    |               |     | 1     |               |     | 371                        | 16.8 | 1            |              |     | 1     |               |     |
| Females                                | 128                     | 9.5  | 0.70 | 0.53 to 0.91  | .01 | 0.71  | 0.54 to 0.93  | .01 | 201                        | 14.9 | 0.72         | 0.58 to 0.90 | .00 | 0.72  | 0.58 to 0.91  | .01 |

Table 2 Continued

|                                        | Severe Hostility Symptoms |      |      |              |     |      |               |     |          | Severe Symptoms Composite Variable |      |              |              |      |               |     |  |  |
|----------------------------------------|---------------------------|------|------|--------------|-----|------|---------------|-----|----------|------------------------------------|------|--------------|--------------|------|---------------|-----|--|--|
|                                        | Symptoms                  |      | Adj. |              |     | Adj. |               |     | Symptoms |                                    | Adj. |              |              | Adj. |               |     |  |  |
|                                        | N                         | %    | OR   | 95 C.I.      | p   | OR   | 95 C.I.       | p   | N        | %                                  | OR   | 95 C.I.      | p            | OR   | 95 C.I.       | p   |  |  |
| <b>Groups</b>                          |                           |      |      |              |     |      |               |     |          |                                    |      |              |              |      |               |     |  |  |
| Police officers 1 (Ref.)               | 16                        | 11.1 | 1    |              |     |      |               |     |          | 26                                 | 18.1 | 1            |              |      |               |     |  |  |
| Police officers 2 (Ref. second column) | 33                        | 6.6  | 0.57 | 0.30 to 1.06 | .08 | 1    |               |     |          | 49                                 | 9.7  | 0.49         | 0.29 to 0.83 | .01  | 1             |     |  |  |
| Bank empl., not victim robbery         | 150                       | 13.5 | 1.68 | 0.96 to 2.96 | .07 | 2.97 | 1.96 to 4.50  | .00 | 236      | 21.2                               | 1.49 | 0.94 to 2.38 | .09          | 3.05 | 2.15 to 4.33  | .00 |  |  |
| Bank empl., victim robbery             | 30                        | 20.3 | 2.62 | 1.34 to 5.10 | .00 | 4.62 | 2.68 to 7.98  | .00 | 49       | 33.1                               | 2.66 | 1.52 to 4.64 | .00          | 5.43 | 3.42 to 8.63  | .00 |  |  |
| Psychiatric hospital empl.             | 29                        | 13.2 | 1.74 | 0.89 to 3.40 | .10 | 3.07 | 1.78 to 5.31  | .00 | 52       | 23.7                               | 1.78 | 1.03 to 3.08 | .04          | 3.66 | 2.34 to 5.72  | .00 |  |  |
| Trainees AT                            | 224                       | 31.5 | 5.06 | 2.86 to 8.94 | .00 | 8.96 | 5.90 to 13.59 | .00 | 328      | 46.2                               | 4.66 | 2.90 to 7.49 | .00          | 9.59 | 6.71 to 13.71 | .00 |  |  |
| Soldiers, not deployed before          | 56                        | 20.1 | 1.83 | 0.98 to 3.42 | .06 | 3.25 | 1.99 to 5.30  | .00 | 66       | 23.7                               | 1.26 | 0.74 to 2.14 | .40          | 2.59 | 1.68 to 3.99  | .00 |  |  |
| Soldier, deployed before               | 44                        | 18.6 | 1.73 | 0.93 to 3.25 | .08 | 3.07 | 1.87 to 5.02  | .00 | 52       | 22.0                               | 1.20 | 0.70 to 2.05 | .50          | 2.47 | 1.60 to 3.81  | .00 |  |  |
| Firefighters                           | 17                        | 13.8 | 1.20 | 0.58 to 2.49 | .63 | 2.13 | 1.14 to 3.97  | .02 | 25       | 20.3                               | 1.09 | 0.59 to 2.01 | .79          | 2.21 | 1.30 to 3.75  | .00 |  |  |
| Social welfare                         | 17                        | 22.4 | 3.62 | 1.68 to 7.82 | .00 | 6.42 | 3.30 to 12.51 | .00 | 21       | 27.6                               | 2.31 | 1.17 to 4.53 | .02          | 4.71 | 2.58 to 8.59  | .00 |  |  |
| <b>Education</b>                       |                           |      |      |              |     |      |               |     |          |                                    |      |              |              |      |               |     |  |  |
| Low-medium (Ref.)                      | 419                       | 16.2 | 1    |              |     | 1    |               |     |          | 591                                | 22.8 | 1            |              |      | 1             |     |  |  |
| High                                   | 197                       | 20.5 | 0.70 | 0.55 to 0.88 | .00 | 0.69 | 0.55 to 0.87  | .00 | 313      | 32.6                               | 0.85 | 0.69 to 1.03 | .10          | 0.84 | 0.69 to 1.02  | .08 |  |  |
| <b>Age</b>                             |                           |      |      |              |     |      |               |     |          |                                    |      |              |              |      |               |     |  |  |
| 18-30 (Ref.)                           | 234                       | 18.1 | 1    |              |     | 1    |               |     |          | 346                                | 26.7 | 1            |              |      | 1             |     |  |  |
| 31-35                                  | 276                       | 17.4 | 1.12 | 0.84 to 1.49 | .46 | 1.13 | 0.84 to 1.51  | .43 | 403      | 25.4                               | 1.11 | 0.87 to 1.44 | .40          | 1.08 | 0.84 to 1.40  | .55 |  |  |
| 46-65                                  | 106                       | 15.9 | 0.92 | 0.71 to 1.20 | .55 | 0.94 | 0.72 to 1.23  | .65 | 155      | 23.2                               | 0.90 | 0.71 to 1.13 | .35          | 0.87 | 0.69 to 1.10  | .25 |  |  |
| <b>Gender</b>                          |                           |      |      |              |     |      |               |     |          |                                    |      |              |              |      |               |     |  |  |
| Males (Ref.)                           | 433                       | 19.7 | 1    |              |     | 1    |               |     |          | 698                                | 27.1 | 1            |              |      | 1             |     |  |  |
| Females                                | 183                       | 13.6 | 0.55 | 0.44 to 0.68 | .00 | 0.55 | 0.44 to 0.69  | .00 | 306      | 22.7                               | 0.63 | 0.52 to 0.77 | .00          | 0.64 | 0.53 to 0.78  | .00 |  |  |

Adj. OR = Odds ratio adjusted for all study variables. 95 CI = 95 confidence interval. Ref. =Reference group  
N.a = Not applicable because the prevalence of very severe anxiety symptoms among firefighter is zero.  
1 Anxiety and/or depression and/or hostility.

Table 3 Differences in prevalence of very severe anxiety, depression and/or hostility symptoms (scores 95<sup>th</sup> centile) between study groups (N=3885).

|                                        | Very Severe Anxiety Symptoms |     |      |               |     |      |               |     | Very Severe Depression Symptoms |      |              |               |      |              |               |     |  |
|----------------------------------------|------------------------------|-----|------|---------------|-----|------|---------------|-----|---------------------------------|------|--------------|---------------|------|--------------|---------------|-----|--|
|                                        | Symptoms                     |     | Adj. |               |     | Adj. |               |     | Symptoms                        |      | Adj.         |               |      | Adj.         |               |     |  |
|                                        | N                            | %   | OR   | 95 C.I.       | p   | OR   | 95 C.I.       | p   | N                               | %    | OR           | 95 C.I.       | p    | OR           | 95 C.I.       | p   |  |
| <b>Groups</b>                          |                              |     |      |               |     |      |               |     |                                 |      |              |               |      |              |               |     |  |
| Police officers 1 (Ref.)               | 2                            | 1.4 | 1    |               |     |      |               | 2   | 1.4                             | 1    |              |               |      |              |               |     |  |
| Police officers 2 (Ref. second column) | 3                            | 0.6 | 0.41 | 0.07 to 2.50  | .34 | 1    |               | 6   | 1.2                             | 0.86 | 0.17 to 4.32 | .86           | 1    |              |               |     |  |
| Bank empl., not victim robbery         | 9                            | 0.8 | 0.73 | 0.15 to 3.56  | .69 | 1.74 | 0.45 to 6.78  | .42 | 30                              | 2.7  | 2.09         | 0.48 to 9.03  | .33  | 2.41         | 0.96 to 6.02  | .06 |  |
| Bank empl., victim robbery             | 7                            | 4.7 | 4.08 | 0.81 to 20.62 | .09 | 9.81 | 2.44 to 39.50 | .00 | 13                              | 8.8  | 7.22         | 1.58 to 33.11 | .01  | 8.35         | 3.06 to 22.80 | .00 |  |
| Psychiatric hospital empl.             | 1                            | 0.5 | 0.38 | 0.03 to 4.41  | .44 | 0.91 | 0.09 to 9.12  | .94 | 13                              | 5.9  | 4.92         | 1.07 to 22.71 | .04  | 5.68         | 2.06 to 15.64 | .00 |  |
| Trainees AT                            | 32                           | 4.5 | 3.20 | 0.70 to 14.53 | .13 | 7.67 | 2.18 to 27.04 | .00 | 69                              | 9.7  | 8.39         | 1.97 to 35.67 | .00  | 9.70         | 4.02 to 23.44 | .00 |  |
| Soldiers, not deployed before          | 2                            | 0.7 | 0.54 | 0.07 to 4.14  | .55 | 1.30 | 0.20 to 8.38  | .78 | 1                               | 0.4  | 0.22         | 0.02 to 2.52  | .22  | 0.26         | 0.03 to 2.19  | .21 |  |
| Soldiers, deployed before              | 0                            | 0.0 | N.A  |               |     |      |               | 2   | 0.8                             | 0.56 | 0.08 to 4.09 | .57           | 0.65 | 0.13 to 3.30 | .61           |     |  |
| Firefighters                           | 0                            | 0.0 | N.A  |               |     |      |               | 2   | 1.6                             | 1.12 | 0.15 to 8.06 | .91           | 1.30 | 0.26 to 6.52 | .75           |     |  |
| Social welfare                         | 1                            | 1.3 | 1.04 | 0.09 to 12.24 | .97 | 2.50 | 0.25 to 25.41 | .44 | 4                               | 5.3  | 4.63         | 0.81 to 26.49 | .08  | 5.34         | 1.43 to 19.96 | .01 |  |
| <b>Education</b>                       |                              |     |      |               |     |      |               |     |                                 |      |              |               |      |              |               |     |  |
| Low-medium (Ref.)                      | 29                           | 1.1 | 1    |               |     |      |               | 82  | 3.2                             | 1    |              |               |      |              |               |     |  |
| High                                   | 28                           | 2.9 | 1.19 | 0.64 to 2.21  | .58 | 1.20 | 0.64 to 2.24  | .56 | 60                              | 6.2  | 0.87         | 0.59 to 1.30  | .50  | 0.87         | 0.59 to 1.30  | .51 |  |
| <b>Age</b>                             |                              |     |      |               |     |      |               |     |                                 |      |              |               |      |              |               |     |  |
| 18-30 (Ref.)                           | 16                           | 1.2 | 1    |               |     |      |               | 52  | 4.0                             | 1    |              |               |      |              |               |     |  |
| 31-35                                  | 32                           | 2.0 | 0.98 | 0.40 to 2.42  | .96 | 0.99 | 0.39 to 2.49  | .98 | 67                              | 4.2  | 1.18         | 0.68 to 2.04  | .56  | 1.18         | 0.68 to 2.05  | .57 |  |
| 46-65                                  | 9                            | 1.3 | 1.15 | 0.53 to 2.49  | .72 | 1.16 | 0.52 to 2.59  | .71 | 23                              | 3.4  | 0.93         | 0.56 to 1.53  | .76  | 0.92         | 0.56 to 1.54  | .76 |  |
| <b>Gender</b>                          |                              |     |      |               |     |      |               |     |                                 |      |              |               |      |              |               |     |  |
| Males (Ref.)                           | 41                           | 1.9 | 1    |               |     |      |               | 86  | 3.9                             | 1    |              |               |      |              |               |     |  |
| Females                                | 16                           | 1.2 | 0.61 | 0.32 to 1.17  | .14 | 0.62 | 0.32 to 1.19  | .15 | 56                              | 4.2  | 0.79         | 0.53 to 1.18  | .25  | 0.80         | 0.54 to 1.19  | .27 |  |



Table 3 Continued

|                                        | Very Severe Hostility Symptoms |     |      |               |     |       |               |     | Very Severe Symptoms Composite Variable |      |              |               |     |       |               |     |
|----------------------------------------|--------------------------------|-----|------|---------------|-----|-------|---------------|-----|-----------------------------------------|------|--------------|---------------|-----|-------|---------------|-----|
|                                        | Symptoms                       |     | Adj. |               |     | Adj.  |               |     | Symptoms                                |      | Adj.         |               |     | Adj.  |               |     |
|                                        | N                              | %   | OR   | 95 C.I.       | p   | OR    | 95 C.I.       | p   | N                                       | %    | OR           | 95 C.I.       | p   | OR    | 95 C.I.       | p   |
| <b>Groups</b>                          |                                |     |      |               |     |       |               |     |                                         |      |              |               |     |       |               |     |
| Police officers 1 (Ref.)               | 2                              | 1.4 | 1    |               |     |       |               |     |                                         |      |              |               |     |       |               |     |
| Police officers 1 (Ref. second column) | 5                              | 1.0 | 0.73 | 0.14 to 3.79  | .70 | 1     |               | 7   | 1.4                                     | 0.67 | 0.17 to 2.62 | .56           | 1   |       |               |     |
| Bank empl., not victim robbery         | 28                             | 2.5 | 1.67 | 0.38 to 7.31  | .50 | 2.25  | 0.83 to 6.12  | .11 | 51                                      | 4.6  | 2.31         | 0.70 to 7.64  | .17 | 3.42  | 1.50 to 7.78  | .00 |
| Bank empl., victim robbery             | 9                              | 6.1 | 4.41 | 0.92 to 21.20 | .06 | 5.97  | 1.92 to 18.54 | .00 | 19                                      | 12.8 | 7.16         | 2.04 to 25.10 | .00 | 10.63 | 4.31 to 26.21 | .00 |
| Psychiatric hospital empl.             | 7                              | 3.2 | 2.40 | 0.48 to 12.07 | .29 | 3.23  | 0.98 to 10.65 | .05 | 16                                      | 7.3  | 4.02         | 1.13 to 14.36 | .03 | 5.95  | 2.36 to 15.05 | .00 |
| Trainees AT                            | 44                             | 6.2 | 5.71 | 1.32 to 24.72 | .02 | 7.71  | 2.90 to 20.49 | .00 | 96                                      | 13.5 | 8.38         | 2.55 to 27.51 | .00 | 12.43 | 5.55 to 27.83 | .00 |
| Soldiers, not deployed before          | 7                              | 2.5 | 1.26 | 0.25 to 6.42  | .78 | 1.70  | 0.51 to 5.72  | .39 | 8                                       | 2.9  | 1.12         | 0.29 to 4.43  | .87 | 1.67  | 0.58 to 4.82  | .34 |
| Soldiers, deployed before              | 4                              | 1.7 | 1.02 | 0.18 to 5.75  | .99 | 1.38  | 0.36 to 5.30  | .64 | 6                                       | 2.5  | 1.10         | 0.27 to 4.54  | .89 | 1.64  | 0.54 to 5.00  | .38 |
| Firefighters                           | 2                              | 1.6 | 1.07 | 0.15 to 7.76  | .94 | 1.49  | 0.28 to 7.78  | .64 | 3                                       | 2.4  | 1.11         | 0.22 to 5.59  | .90 | 1.66  | 0.42 to 6.51  | .47 |
| Social welfare                         | 7                              | 9.2 | 9.20 | 1.81 to 46.91 | .01 | 12.57 | 3.73 to 42.40 | .00 | 9                                       | 11.8 | 7.68         | 1.97 to 29.89 | .00 | 11.41 | 4.01 to 32.45 | .00 |
| <b>Education</b>                       |                                |     |      |               |     |       |               |     |                                         |      |              |               |     |       |               |     |
| Low-medium (Ref.)                      | 78                             | 3.0 | 1    |               |     | 1     |               |     | 134                                     | 5.2  | 1            |               |     |       |               |     |
| High                                   | 37                             | 3.9 | 0.62 | 0.39 to 0.99  | .05 | 0.62  | 0.39 to 0.99  | .05 | 84                                      | 8.7  | 0.79         | 0.56 to 1.10  | .16 | 0.79  | 0.56 to 1.10  | .16 |
| <b>Age</b>                             |                                |     |      |               |     |       |               |     |                                         |      |              |               |     |       |               |     |
| 18-30 (Ref.)                           | 53                             | 4.1 | 1    |               |     | 1     |               |     | 88                                      | 6.8  | 1            |               |     |       |               |     |
| 31-35                                  | 44                             | 2.8 | 1.56 | 0.85 to 2.85  | .15 | 1.67  | 0.89 to 3.11  | .11 | 96                                      | 6.0  | 1.28         | 0.82 to 2.02  | .28 | 1.31  | 0.83 to 2.06  | .25 |
| 46-65                                  | 18                             | 2.7 | 0.87 | 0.49 to 1.54  | .63 | 0.95  | 0.52 to 1.72  | .86 | 34                                      | 5.1  | 0.92         | 0.60 to 1.39  | .69 | 0.94  | 0.61 to 1.44  | .77 |
| <b>Gender</b>                          |                                |     |      |               |     |       |               |     |                                         |      |              |               |     |       |               |     |
| Males (Ref.)                           | 66                             | 3.0 | 1    |               |     | 1     |               |     | 130                                     | 5.9  | 1            |               |     | 1     |               |     |
| Females                                | 49                             | 3.6 | 0.87 | 0.55 to 1.35  | .53 | 0.88  | 0.56 to 1.37  | .56 | 88                                      | 6.5  | 0.81         | 0.58 to 1.12  | .20 | 0.81  | 0.59 to 1.13  | .22 |

Adj. OR = Odds ratio adjusted for all study variables. 95 CI = 95 confidence interval. Ref. =Reference group

N.a = Not applicable because the prevalence of very severe anxiety symptoms among firefighter is zero.

<sup>1</sup> Anxiety and/or depression and/or hostility.

Appendix A Bivariate associations between predictors and dependent variables

|                                        | Severe Anxiety symptoms |     | Severe Depression symptoms |     | Severe hostility symptoms |     | Severe Symptoms Composite |     |
|----------------------------------------|-------------------------|-----|----------------------------|-----|---------------------------|-----|---------------------------|-----|
|                                        | OR                      | p   | OR                         | p   | OR                        | p   | OR                        | p   |
| <b>Groups</b>                          |                         |     |                            |     |                           |     |                           |     |
| Police officers 1 (Ref.)               | 1                       |     |                            |     | 1                         |     |                           |     |
| Police officers 2 (Ref. second column) | 0.53                    | .13 | 1                          |     | 0.41                      | .01 | 1                         |     |
| Bank employees, not victim robbery     | 1.16                    | .68 | 2.21                       | .00 | 1.02                      | .94 | 2.51                      | .00 |
| Bank employees, victim robbery         | 4.14                    | .00 | 7.89                       | .00 | 1.98                      | .04 | 4.86                      | .00 |
| Psychiatric hospital employees         | 1.68                    | .21 | 3.19                       | .00 | 1.47                      | .22 | 3.61                      | .00 |
| Trainees AT                            | 4.40                    | .00 | 8.38                       | .00 | 4.24                      | .00 | 10.41                     | .00 |
| Soldiers, not deployed before          | 0.98                    | .96 | 1.86                       | .08 | 0.58                      | .12 | 1.42                      | .25 |
| Soldiers, deployed before              | 0.80                    | .63 | 1.53                       | .27 | 0.62                      | .18 | 1.52                      | .19 |
| Firefighters                           | 0.64                    | .43 | 1.21                       | .71 | 1.12                      | .77 | 2.74                      | .00 |
| Social welfare                         | 3.10                    | .01 | 5.90                       | .00 | 2.15                      | .04 | 5.29                      | .00 |
| <b>Education</b>                       |                         |     |                            |     |                           |     |                           |     |
| Low-medium                             | 1                       |     |                            |     | 1                         |     |                           |     |
| High                                   | 1.70                    | .00 | 1.63                       | .00 | 2.18                      | .00 | 2.15                      | .00 |
| <b>Age</b>                             |                         |     |                            |     |                           |     |                           |     |
| 18-30                                  | 1                       |     |                            |     | 1                         |     |                           |     |
| 31-35                                  | 0.89                    | .43 | 0.83                       | .25 | 0.89                      | .36 | 0.83                      | .16 |
| 46-65                                  | 0.96                    | .79 | 0.93                       | .63 | 1.01                      | .95 | 0.96                      | .73 |
| <b>Gender</b>                          |                         |     |                            |     |                           |     |                           |     |
| Males                                  | 1                       |     |                            |     | 1                         |     |                           |     |
| Females                                | 0.86                    | .19 | 0.85                       | .18 | 0.87                      | .13 | 0.85                      | .10 |

## Appendix A Continued

|                                        | Very Severe Anxiety symptoms |      |      |      | Very Severe Depression symptoms |     |      |     | Very Severe hostility symptoms |     |       |     | Very Severe symptoms Composite |     |       |     |
|----------------------------------------|------------------------------|------|------|------|---------------------------------|-----|------|-----|--------------------------------|-----|-------|-----|--------------------------------|-----|-------|-----|
|                                        | OR                           | p    | OR   | p    | OR                              | p   | OR   | p   | OR                             | p   | OR    | p   | OR                             | p   | OR    | p   |
| Groups                                 |                              |      |      |      |                                 |     |      |     |                                |     |       |     |                                |     |       |     |
| Police officers 1 (Ref.)               | 1                            |      |      |      | 1                               |     |      |     | 1                              |     |       |     | 1                              |     |       |     |
| Police officers 2 (Ref. second column) | 0.43                         | .35  | 1    |      | 0.86                            | .85 | 1    |     | 0.71                           | .69 | 1     |     | 0.66                           | .56 | 1     |     |
| Bank employees, not victim robbery     | 0.58                         | .49  | 1.36 | .65  | 1.97                            | .36 | 2.30 | .07 | 1.83                           | .41 | 2.57  | .05 | 2.26                           | .18 | 3.40  | .00 |
| Bank employees, victim robbery         | 3.53                         | .12  | 8.27 | .00  | 6.84                            | .01 | 7.98 | .00 | 4.60                           | .05 | 6.45  | .00 | 6.92                           | .00 | 10.44 | .00 |
| Psychiatric hospital employees         | 0.33                         | .36  | 0.77 | .82  | 4.48                            | .05 | 5.23 | .00 | 2.34                           | .29 | 3.29  | .04 | 3.70                           | .04 | 5.59  | .00 |
| Trainees AT                            | 3.35                         | .10  | 7.87 | .00  | 7.64                            | .01 | 8.92 | .00 | 4.69                           | .03 | 6.58  | .00 | 7.35                           | .00 | 11.08 | .00 |
| Soldiers, not deployed before          | 0.51                         | .51  | 1.21 | .84  | 0.26                            | .27 | 0.30 | .27 | 1.83                           | .45 | 2.57  | .11 | 1.39                           | .63 | 2.10  | .16 |
| Soldiers, deployed before              | 0.00                         | 1.00 | 0.00 | 1.00 | 0.61                            | .62 | 0.71 | .67 | 1.22                           | .82 | 1.72  | .42 | 1.23                           | .78 | 1.85  | .27 |
| Firefighters                           | 0.00                         | 1.00 | 0.00 | 1.00 | 1.17                            | .87 | 1.37 | .70 | 1.17                           | .87 | 1.65  | .55 | 1.18                           | .85 | 1.77  | .41 |
| Social welfare                         | 0.95                         | .97  | 2.22 | .49  | 3.94                            | .12 | 4.60 | .02 | 7.20                           | .02 | 10.10 | .00 | 6.31                           | .01 | 9.52  | .00 |
| Education                              |                              |      |      |      |                                 |     |      |     |                                |     |       |     |                                |     |       |     |
| Low-medium                             | 1                            |      |      |      | 1                               |     |      |     | 1                              |     |       |     | 1                              |     |       |     |
| High                                   | 2.65                         | .00  | 2.71 | .00  | 2.04                            | .00 | 1.98 | .00 | 1.29                           | .21 | 1.26  | .26 | 1.76                           | .00 | 1.71  | .00 |
| Age                                    |                              |      |      |      |                                 |     |      |     |                                |     |       |     |                                |     |       |     |
| 18-30                                  | 1                            |      |      |      | 1                               |     |      |     | 1                              |     |       |     | 1                              |     |       |     |
| 31-35                                  | 0.92                         | .83  | 0.93 | .87  | 1.17                            | .53 | 1.10 | .70 | 1.54                           | .12 | 1.57  | .12 | 1.36                           | .14 | 1.30  | .22 |
| 46-65                                  | 1.50                         | .28  | 1.54 | .28  | 1.23                            | .40 | 1.19 | .49 | 1.03                           | .93 | 1.09  | .78 | 1.20                           | .38 | 1.18  | .43 |
| Gender                                 |                              |      |      |      |                                 |     |      |     |                                |     |       |     |                                |     |       |     |
| Males                                  | 1                            |      |      |      | 1                               |     |      |     | 1                              |     |       |     | 1                              |     |       |     |
| Females                                | 0.63                         | .13  | 0.64 | .13  | 1.07                            | .71 | 1.05 | .80 | 1.22                           | .30 | 1.21  | .33 | 1.12                           | .45 | 1.09  | .54 |

OR = Odds ratio.  
Ref. =Reference group

For peer review only

1  
2  
3  
4  
5  
6  
7  
8  
9  
10  
11  
12  
13  
14  
15  
16  
17  
18  
19  
20  
21  
22  
23  
24  
25  
26  
27  
28  
29  
30  
31  
32  
33  
34  
35  
36  
37  
38  
39  
40  
41  
42  
43  
44  
45  
46  
47  
48  
49

1  
2  
3 Police officers: a high risk group for the development of mental health disturbances? A  
4  
5 cohort study  
6  
7  
8  
9  
10

11 Peter. G. van der Velden (Ph.D)<sup>a,b,c</sup>  
12  
13

14 Arthur R. Rademaker (Ph.D)<sup>d</sup>  
15  
16

17 Eric Vermetten ( M.D. Ph.D.)<sup>d</sup>  
18  
19

20 Marie-Anne Portengen (M.D.)<sup>e</sup>  
21  
22

23 Joris C. Yzermans (Ph.D.)<sup>f</sup>  
24  
25

26 Linda Grievink (Ph.D.)<sup>g</sup>  
27  
28  
29  
30  
31  
32

33 <sup>a</sup> Institute for Psychotrauma, Nienoord 5, Diemen, The Netherlands  
34  
35

36 <sup>b</sup> INTERVICT, Tilburg University, Tilburg, the Netherlands  
37  
38

39 <sup>c</sup> Arq Psychotrauma Expert Group, Diemen, The Netherlands  
40  
41  
42

43 <sup>d</sup> Military Mental Health Research Center and University Medical Center Utrecht, Utrecht,  
44  
45 The Netherlands  
46  
47

48 <sup>e</sup> Occupational health services ARBOUNIE, Dordrecht, The Netherlands  
49  
50

51 <sup>f</sup> Netherlands Institute for Health Services Research, Utrecht, The Netherlands  
52  
53

54 <sup>g</sup> National Institute for Public Health and the Environment, Bilthoven, The Netherlands  
55  
56  
57  
58  
59  
60

**Keywords**

Police officers, Anxiety, Depression, Hostility, Comparative study

**Word count**

2925 (exc. Title page, abstract, references, "what this study adds", and tables)

For peer review only

**ABSTRACT****Objectives**

Policing is generally considered a high risk profession for the development of mental health problems, but this assumption lacks empirical evidence. Research question of the present study is to what extent mental health disturbances, such as (very) severe symptoms of anxiety, depression and hostility are more prevalent among police officers than among other occupational groups.

**Design**

Multi-comparative cross sectional study using the data of several cross sectional and longitudinal studies in the Netherlands.

**Participants**

Two samples of police officers (N=144, N=503), employees of banks (N=1113) and employees of banks who were robbed (N=148); employees of supermarkets (N=335), and a psychiatric hospital (N=219), employees of a governmental social welfare organization (N=76), employees who followed a training based on Rational-motive therapy (RET) to strengthen their assertiveness (N=710), soldiers before deployment (N=278) and before re-deployment (N=236), and firefighters (N=123). The numbers refer to respondents with complete data.

**Primary outcomes**

1  
2  
3 Prevalence of severe (sub clinical level) and very severe symptoms (clinical level) were  
4  
5 computed using the Dutch norm tables (80<sup>th</sup> percentile en 95<sup>th</sup> percentile respectively) of the  
6  
7 SCL-90-R. All comparisons were controlled for age, gender and education.  
8  
9

## 10 11 12 **Results**

13  
14 Multivariate logistic regression and analyses showed that the prevalence of clinical and sub  
15  
16 clinical levels of symptoms of anxiety, depression and hostility among police officers were  
17  
18 not significantly higher than among comparison groups. The same pattern was found for the  
19  
20 other SCL-90-R sub scales.  
21  
22  
23  
24  
25  
26

## 27 **Conclusions**

28  
29 We found no indications that self-reported mental health disturbances were more prevalent  
30  
31 among police officers than among groups of employees that are not considered high risk  
32  
33 groups, such as employees of banks, supermarkets, psychiatric hospital and soldiers before  
34  
35 deployment.  
36  
37  
38  
39  
40  
41  
42  
43  
44  
45  
46  
47  
48  
49  
50  
51  
52  
53  
54  
55  
56  
57  
58  
59  
60



1  
2  
3  
4  
5  
6 Police officers are commonly considered to be a high-risk group for the development of  
7  
8 mental health disturbances because of the various critical incidents and potential traumatic  
9  
10 events they encounter during their career. These so-called operational stressors, such as  
11  
12 witnessing the death of children, confrontations with victims of sexual harassment, serious  
13  
14 traffic accidents, suicide, and experiencing violence, might increase the risk of symptoms of  
15  
16 anxiety, hostility and fatigue. A (small) minority may develop mental disorders, such as  
17  
18 depression and PTSD<sup>1-4</sup>.  
19  
20  
21

22  
23 On the other hand, research in the past 20 years among police officers has shown  
24  
25 that organizational stressors such as conflicts, work load, and lack of support are more likely  
26  
27 to be adverse sources of stress than operational stressors. In other words, although police  
28  
29 officers are more frequently confronted with critical incidents than for example employees  
30  
31 of banks or supermarkets, organizational stressors -which are not specific for the police-  
32  
33 appear to have more impact on health and well-being than (daily) operational stressors<sup>2, 5-7</sup>.  
34  
35  
36

37 This may explain the outcomes of a study<sup>8</sup> in the U.K. which ranked 26 professions  
38  
39 according to their scores on general psychological well-being and physical health. The rank  
40  
41 orders for police officers was 9<sup>th</sup> and 11<sup>th</sup>, with the first place denoting the professional  
42  
43 occupation with the highest absolute mean score of health problems . Teachers, a  
44  
45 professional group that is not typically associated with frequent exposure to potential  
46  
47 traumatic stressors, ranked 2<sup>nd</sup> on both well-being and physical health. Similarly, an earlier  
48  
49 smaller Australian comparative study reported that police officers showed significantly more  
50  
51 favorable levels of well-being and psychological distress than school teachers and the  
52  
53 general population (i.e. Australian norm scores)<sup>9</sup>.  
54  
55  
56  
57  
58  
59  
60

1  
2  
3 However, to the best of our knowledge there is no, peer reviewed- published multi-  
4 comparative study that a.) statistically examined differences in symptom levels between the  
5 police and several other occupational groups while also controlling for confounding factors  
6 such as age, gender and education, and b.) focused on specific mental health disturbances  
7 including sub clinical and clinically relevant levels of symptoms of anxiety, depression, and  
8 hostility. Aim of this comparative study was to explore self-reported mental health of police  
9 officers compared to members of other professions, to investigate whether there are  
10 empirically based indications that policing may be considered a high risk profession for the  
11 development of mental health disturbances.  
12  
13  
14  
15  
16  
17  
18  
19  
20  
21  
22  
23  
24  
25  
26  
27  
28

## 29 **METHODS**

### 30 **Samples and procedures**

31  
32  
33  
34  
35  
36 In the present study we compared police officers with nine other occupational groups. The  
37 presented numbers of each group refer to the number of respondents of each study group  
38 with complete data.  
39  
40  
41

42  
43 We compared the health of two samples of officers ( $N^{\text{group1}}=144$ ,  $N^{\text{group2}}=503$ ) with other  
44 occupational groups. Group 1 consisted of police officers working in the eastern part of the  
45 Netherlands (region department North and East Gelderland, response=60%)<sup>10</sup>. This group  
46 was originally selected in 2002 to provide reference data for group 2 to examine the  
47 consequences of the disaster and other critical incidents on health. Group 2 consisted of  
48 police officers who were involved in the Enschede fireworks disaster and its aftermath (The  
49 Netherlands, 2000), and participated in a survey 4 years post-event (2004, response=  
50  
51  
52  
53  
54  
55  
56  
57  
58  
59  
60

80.5%)<sup>5</sup>. At that time, only one officer (0,2%) suffered from probable disaster-related PTSD.

These studies were conducted on behalf of the Dutch Ministry of Health, Welfare and Sports.

We compared the two groups of officers with the following non-clinical groups of employees participating in various Dutch studies on health and critical incidents at work. Furthermore, data from group 6 was obtained to evaluate a training program (see below). The year of data gathering is presented between brackets and funding for each study will be described. This study is a clear example of a data-sharing research project of the researchers involved.

- Group 3 and 4 (1991): A nationwide sample of 1257 front office employees of savings banks , of whom 11.5% experienced one of more bank robberies ( $N^{\text{group3}}=1113$  and  $N^{\text{group4}}=144$  respectively, response=71%)<sup>11</sup>. This cross sectional study was conducted on behalf of a Savings Banks Association, The Netherlands.
- Group 5 (1996): A random sample of mental health care professionals, i.e. nurses and therapists of a psychiatric hospital ( $N=219$ , response=70%)<sup>12</sup>. This cross sectional study was conducted on behalf of a Psychiatric Hospital.
- Group 6 (1997-1998): Random sample of employees of various organizations, before participating in a RET training ( $N=710$ , response=74%)<sup>13</sup> aimed at improving their assertiveness and well-being. The cross sectional study was conducted on behalf of a training institute in the Netherlands.
- Group 7 and 8 (2005-2007): Sample of 524 soldiers from a larger prospective cohort study on stress-related disorders who were assessed prior to a 4-month deployment to Afghanistan of whom 241 were deployed before ( $N^{\text{group7}}=278$  and  $N^{\text{group8}}=236$

- 1  
2  
3 respectively, response= 82.5%)<sup>14</sup>, conducted on behalf of the Dutch Ministry of  
4  
5 Defense.  
6  
7  
8 - Group 9 (2002): Firefighters from the Utrecht firefighters department (N=123,  
9  
10 response=48%)<sup>15</sup>. This cross sectional study was conducted on behalf of the Dutch  
11  
12 Ministry of Health, Welfare and Sport.  
13  
14 - Group 10 (1995): Employees of a governmental social welfare organization in the  
15  
16 Western part of the Netherlands, who had direct contact with clients of the  
17  
18 organization (N=76, response=65%)<sup>16</sup>. This cross sectional study was conducted to  
19  
20 finish the Occupational Physician education program of the researcher.  
21  
22  
23 - Groups 11 (1996): A nationwide random sample of employees of local supermarkets  
24  
25 (N=335, response=88%)<sup>17</sup>. This cross sectional study was conducted on behalf of a  
26  
27 large supermarket organization in the Netherlands.  
28  
29

30  
31 All participants in the studies mentioned above, received written information about the  
32  
33 scientific study aims. None of the funding organizations mentioned above were involved in  
34  
35 the present study design, analyses and manuscript.  
36  
37  
38  
39

#### 40 41 **Measures**

42  
43 Besides questions regarding age, gender and education, respondents of all groups, except  
44  
45 group 11, completed the total **Symptom Check List Revised** (SCL-90-R)<sup>18,19</sup>. This instrument  
46  
47 uses a five-point Likert scale (from 1, 'not at all' to 5, 'extremely') and assesses symptoms  
48  
49 over the previous 7 days. The validity and reliability of the Dutch SCL-90-R has proven to be  
50  
51 satisfactory<sup>19</sup>. The Dutch cut-off scores<sup>19</sup> from 1986 for males and females of a normal  
52  
53 population were used to identify participants with a.) at least severe symptoms of anxiety,  
54  
55 depression, sleeping problems and hostility (80<sup>th</sup> percentile,) and b.) with very severe  
56  
57  
58  
59  
60

1  
2  
3 symptoms (95<sup>th</sup> percentile) that are clinically relevant and may be indicative for a mental  
4  
5 disorder. Group 11 was administered a brief scale consisting of 17 random items of the SCL-  
6  
7 90-R. Our control analyses showed that the sum score of the 17 items correlated highly with  
8  
9 the total score of the SCL-90-R across several samples ( $r > .95$ ). Education levels differed  
10  
11 slightly across studies. We therefore made a distinction between those with high education  
12  
13 levels (university and higher professional education) versus low to medium level (all other  
14  
15 levels).  
16  
17  
18  
19  
20  
21

### 22 **Data analyses**

23  
24 Differences in demographics were assessed using chi-square statistics. Multivariate logistic  
25  
26 regression analyses were used to examine to what extent very severe symptoms and severe  
27  
28 symptoms were more prevalent among police officers, while controlling for age, gender and  
29  
30 education level. Two composite variables on mental health were computed. The first  
31  
32 composite variable was based on whether respondents reported very severe anxiety, very  
33  
34 severe depression and/or very severe hostility symptoms or did not report very severe  
35  
36 symptoms on any of these three scales. A similar composite variable was based on severe  
37  
38 symptoms. The multivariate logistic regression analyses were repeated with these composite  
39  
40 variables as dependent variables, and group membership, age, gender and education as  
41  
42 independent variables (predictors). ANOVA was used to examine differences in mean scores  
43  
44 on the sum score of 17 items between group 1, 2 and 11 while controlling for the same  
45  
46 possible confounding factors. SPSS version 18.0 was used to perform the analyses.  
47  
48  
49  
50  
51  
52  
53  
54

### 55 **RESULTS**

1  
2  
3 The demographics are shown in Table 1. Chi-squares statistics indicated that study groups  
4  
5 differed in gender ( $\chi^2=897.6$ ,  $df=9$ ,  $p < .001$ ), age ( $\chi^2=798$ ,  $df=18$ ,  $p < .001$ ) and educational  
6  
7 level ( $\chi^2=852.4$ ,  $df=9$ ,  $p < .001$ ).  
8  
9

10 The prevalence's of very severe symptoms (95<sup>th</sup> percentile) are presented (except  
11  
12 group 11) in Table 2, as well as the adjusted Odd Ratios (Adj. OR) and the 95% confidence  
13  
14 intervals (95% CI). In Table 3, similar statistics are presented with respect to severe  
15  
16 symptoms (80<sup>th</sup> percentile). A table of the bivariate OR's is available on request (see  
17  
18 appendix A)  
19  
20

21 Results clearly show that both groups of police officers are relatively healthy: the  
22  
23 proportion of officers with very severe symptoms of anxiety, depression, and hostility is  
24  
25 extremely low ( $\leq 1.4\%$ ). Compared to all other study groups, police officers had similar or  
26  
27 lower prevalence of clinical levels of mental health problems according to the adjusted odd  
28  
29 ratios. When using a less strict criterion of sub clinical levels, i.e. at least severe symptoms  
30  
31 instead of very severe symptoms according to the norm tables, the groups of officers still  
32  
33 ranked as groups with relatively low prevalence rates. Furthermore, the proportion of  
34  
35 officers with severe or very severe symptoms of anxiety or depression or hostility (i.e.  
36  
37 composite variables), was not significantly higher than among other groups. Additional  
38  
39 analyses showed similar patterns with respect to the other sub scales of the SCL-90-R (data  
40  
41 not shown).  
42  
43  
44  
45  
46

47 The results of ANOVA ( $F^{\text{main}}=25.5$ ,  $df=2$ ,  $p < .001$ ) and post hoc analyses reveal the  
48  
49 2004 sample of police officers to exhibit significantly lower mean scores on the 17 item sum  
50  
51 score than employees of supermarkets, while the 2002 sample did not differ significantly  
52  
53 from supermarket employees (Police<sup>2002</sup>:  $M=20.7$ ,  $SD=5.9$ ; Police<sup>2004</sup>:  $M=18.9$ ,  $SD=4.37$ ;  
54  
55 Super market:  $M=22.6$ ,  $SD=7.28$ ).  
56  
57  
58  
59  
60

## DISCUSSION

We found no indications that sub clinical mental health problems, i.e. severe symptoms, were more prevalent amongst police officers than amongst other occupational groups in our comparative study. The same pattern was observed with respect to very severe symptoms, i.e. a level of self-reported symptoms that may be indicative of the presence of mental disorders such as generalized anxiety disorder or major depressive disorder. Surprisingly, findings showed that officers in our comparative study were as healthy as study groups that are not considered high risk professions, such as employees of banks (not victimized by robberies), supermarket employees, mental health care professionals and soldiers before deployment. Moreover, they strongly differed from employees participating in a RET training because of mental health problems that were associated with a lack of assertiveness. Although we are not aware of a similar multi-comparative study, these findings appear to be in line with the outcomes of a Dutch study on burnout among officers showing that officers had lower levels of emotional exhaustion than one large reference group consisting of various occupations<sup>20</sup>, a Norwegian study<sup>1</sup> showing that officers exhibited lower levels of emotional exhaustion (but higher levels of depersonalization) than physicians, and the outcomes of the aforementioned studies<sup>8,9</sup>. However, these studies did not control of adjust for the possible confounding effects of demographics in contrast to our study.

How can these findings be explained? In the Dutch situation police officers follow a rigorous selection process: about 90% of those applying to the officer training program is rejected (personal communication Dr. Annika Smit, Dutch Police Academy). Moreover, officers are trained to deal and cope with critical incidents and as a consequence may be highly resilient to mental health problems<sup>21</sup>. This may explain why bank employees (not

1  
2  
3 selected to cope with severe incidents nor trained as rigorously as police officers), who were  
4  
5 confronted with bank robberies reported significantly more (severe and very severe) mental  
6  
7 health disturbances.  
8

9  
10 Interestingly, in an older prospective study among police officers involved as body  
11  
12 handlers in a disaster, no increases in health problems compared with pre-disaster levels  
13  
14 were observed<sup>22</sup>. These findings seriously question the generally held belief that policing is a  
15  
16 high risk profession with respect to mental health: is it perhaps a (partial) myth? Either way,  
17  
18 it reminds us of the debate on suicide among officers that once (in fact) has been described  
19  
20 as an epidemic<sup>23</sup>. However, the critical review on suicide among officers of Hem and  
21  
22 colleagues<sup>23</sup> clearly demonstrated that no evidence of an elevated suicide rate among  
23  
24 officers actually exists and that previous research had serious methodological shortcomings.  
25  
26  
27

28  
29 Despite the strength of our study, i.e. multiple comparison groups and controlling for  
30  
31 age, gender and education, some possible limitations and characteristics should be  
32  
33 discussed. First, although very high scores on the SCL-90-R (very severe symptoms) may be  
34  
35 indicative of a mental disorder, we did not conduct clinical interviews to examine the  
36  
37 prevalence of mental disorders such as generalized anxiety, major depression and PTSD  
38  
39 across samples. Very severe symptoms are considered to be clinically relevant. According to  
40  
41 the Dutch norm tables<sup>19</sup> the mean scores of a norm group of psychiatric patients on the  
42  
43 subscales anxiety and depression were 26.0 (sd=9.9) and 41.9 (sd=14.8) respectively. In our  
44  
45 total sample the mean scores of those with very severe anxiety and depression symptoms  
46  
47 were 27.7 (sd=5.2) and 43.3 (sd=8.1) respectively. Therefore, it is not very likely that the  
48  
49 prevalence rates obtained from clinician rated instruments would be (much) higher than the  
50  
51 prevalence rates obtained by self-report measures such as the SCL-90-R<sup>24</sup>.  
52  
53  
54  
55  
56  
57  
58  
59  
60



1  
2  
3 Second, we were not able to compare the prevalence of PTSD across our study  
4  
5 samples. Therefore, it is possible that the prevalence of PTSD among police officers is higher  
6  
7 than among the other study groups. However, given the marked overlap of PTSD symptoms  
8  
9 with other disorders and the typical comorbidity rates of PTSD with for instance  
10  
11 depression<sup>25,26</sup>, it is unlikely that police officers with PTSD, did not suffer from other severe  
12  
13 mental health disturbances. Indeed, a large study among UK military personnel (N=10069)<sup>27</sup>  
14  
15 showed that 344 out of the 394 PTSD cases (87.3%) reported severe mental health  
16  
17 problems, i.e. were GHQ cases (high scores on the General Health Questionnaire). Only a  
18  
19 small group of PTSD cases (N=50, 12.7%) were not identified as being a GHQ case (personal  
20  
21 communication prof. Roberto Rona). Control analyses among another sample (N=67) of  
22  
23 Dutch employees seeking treatment at the Institute for Psychotrauma for (probable) PTSD  
24  
25 following various traumatic events, showed similar results. In total, 86.6% (N=58) of the  
26  
27 (probable) PTSD cases (N=67, Scores on the Impact of Event Scale (IES) of 35 or more<sup>28</sup>) also  
28  
29 reported very severe mental health problems according to our composite variable of very  
30  
31 severe symptoms. These findings are in line with previous research<sup>28,30</sup>, demonstrating that  
32  
33 PTSD and SCL-90-R scores are strongly associated. Thus, an increased prevalence rate for  
34  
35 PTSD in the absence of marked mental health problems would be highly unlikely.  
36  
37  
38  
39  
40  
41  
42

43 Third, the two groups of officers were not drawn from national samples of officers.  
44  
45 Group 1 was obtained in the eastern part of the Netherlands, but group 2 consisted of  
46  
47 officers from several regions in the Netherlands (mainly east, mid and west). We have no  
48  
49 data on the non-response of group 1. Although both groups did not differ in prevalence rates  
50  
51 of very severe anxiety, depression and hostility symptoms (i.e. clinical level of symptoms),  
52  
53 significant differences were found in the prevalence of severe depression symptoms (80<sup>th</sup>  
54  
55 percentile). This may reflect the normal variety of the prevalence of symptoms among sub  
56  
57  
58  
59  
60

1  
2  
3 samples within one occupational group. In addition, table 2 showed that females in our  
4  
5 study less often had severe symptoms than males (although the prevalence of very severe  
6  
7 symptoms did not differ between both sub groups) while in the general population the  
8  
9 opposite is found<sup>19</sup>. However, our study samples do not reflect the general population (see  
10  
11 table 1). We used the Dutch norm tables for males and females: the cut-offs scores for  
12  
13 females are slightly higher than for males to enable such comparisons<sup>19</sup>.  
14  
15

16  
17 Finally, one could hypothesize that the data of our study groups were not all obtained  
18  
19 very recently and that for instance the current prevalence of mental health problems among  
20  
21 police officers is (much) higher. The data were in fact obtained in the period 1991-2007. It is  
22  
23 possible in principle that the stability of the prevalence of assessed clinical and sub clinical  
24  
25 symptoms varied across the study groups during this period. Therefore we cannot rule out  
26  
27 the possibility that for instance mental health problems among police officers increased over  
28  
29 these years, while those of bank employees decreased and those of soldiers remained  
30  
31 stable. Unfortunately, we are not aware of any study assessing and demonstrating  
32  
33 differences in trajectories of prevalence between the study groups over a period of 16 years.  
34  
35 However, epidemiological studies among the general population examining 12-months  
36  
37 prevalence of mental disorders may shed more light on this issue. Kessler and colleagues<sup>31</sup>  
38  
39 showed that the 12-months prevalence of any mental disorder was more or less stable over  
40  
41 a 10-years period, i.e. 29.5% and 26.2% respectively. With respect to the Netherlands, the  
42  
43 NEMESIS study<sup>32</sup> showed similar outcomes: in contrast to the expectations of mental health  
44  
45 professional the 12-months prevalence remained stable at about 17%<sup>33</sup> in a similar period.  
46  
47 These important results suggest that, although the studies were conducted among the  
48  
49 general population, it is more likely that the prevalence of assessed mental health problems  
50  
51 was relatively stable and did not differ significantly across occupational groups over time.  
52  
53  
54  
55  
56  
57  
58  
59  
60

1  
2  
3 Participants of all eleven study groups were inhabitants of the Netherlands.  
4  
5 Therefore, future research is warranted to examine to what extent our findings can be  
6  
7 generalized to countries with different political, social, medical and legal systems, and  
8  
9 selection and training procedures of officers. We were not able to control for other  
10  
11 influential factors such as organizational characteristics . Finally, we did not examine the  
12  
13 extent of substance use such as the consumption of alcohol and smoking. Although the  
14  
15 outcomes of Sterud and colleagues<sup>34</sup> did not support the notion of a strong relationship  
16  
17 between occupational stress and alcohol use in police officers, it is unclear whether alcohol  
18  
19 use differs from the other groups in our study.  
20  
21  
22  
23  
24  
25

## 26 CONCLUSIONS

27  
28 Despite these limitations, the present study demonstrates that, although policing is generally  
29  
30 viewed as a high risk profession, mental health disturbances are not more prevalent in police  
31  
32 officers as compared to various other occupational cohorts in our study. Several of these  
33  
34 groups such as bank employees (not being robbed) and supermarket employees, as well as  
35  
36 soldiers before deployment are typically not considered to be “high risk professions”. These  
37  
38 findings suggest that the positive effects on the mental health of police officers of the  
39  
40 selection process, self-selection and resilience, given the amount of potential stressful and  
41  
42 traumatic events they encounter during their career, should not be underestimated.  
43  
44  
45  
46  
47  
48  
49  
50  
51  
52  
53  
54  
55  
56  
57  
58  
59  
60

## Abstract

### Article focus

- It is generally assumed that police officers, due to the specific nature of their work, are at (high) risk for the development of mental health problems.
- The results of the very limited number of studies that compared the mental health of officers with one or two comparison groups, suggest that this assumption needs further proof.
- To assess this assumption, clinical as well as sub clinical levels of mental health problems of officers were compared with 9 other occupational groups while controlling for demographics.

### Key messages

- In contrast to this generally held belief, officers did not report more (serious) mental health problems than any of the other examined groups in our multi-comparative study.
- The protective effects of self-selection, the resilience of police officers and a rigorous selection-process of recruits, might be an explanation of the relatively low prevalence rates of mental health disturbances.

### Strengths and limitations

- To the best of our knowledge, this is the first multi-comparative study examining to what extent clinical as well as sub clinical levels of symptoms of anxiety, depression and hostility are more prevalent among police officers than among people in other occupations, while controlling for demographics.
- We did not conduct clinical interviews

### **Acknowledgements**

We would like to express our gratitude to Professor RJ Rona (Institute of Psychiatry, King's College London) for his courteous help, i.e. providing us the cross tabulation data on PTSD and GHQ cases among UK military. In addition, we like to thank M Bosmans (Msc), and A Pemberton (PhD, INTERVICT, Tilburg University) for their help en support, and A Smit (PhD, Dutch Police Academy) for providing information on the selection process of officers.

### **Competing interests**

None.

## References

1. **Berg AM**, Hem E, Lau B, et al. An exploration of job stress and health in the Norwegian police service: cross sectional study. *J Occup Med Toxicol* 2006; **1**:26.
2. **Maguen S**, Metzler TJ, McCaslin SE, et al. Routine work environment stress and PTSD symptoms in police officers. *J Nerv and Ment Dis* 2009; **197**: 754–760.
3. **Stephens C**, Miller I. Traumatic experiences and posttraumatic stress disorder in the New Zealand police. *Policing* 1998; **21**: 178–191.
4. **Hartley TA**, Violanti JM, Fekedulegn D, et al. Associations between major life events, traumatic incidents, and depression among Buffalo police officers. *Int J Emerg Ment Health* 2007; **9**: 25–35.
5. **Velden PG van der**, Kleber RJ, Grievink L, et al. Confrontations with aggression and mental health problems in police officers: The role of organizational stressors, life-events and previous mental health problems. *Psychol Trauma: Theory, Res, Practice, Policy* 2010; **2**: 135–144.
6. **Liberman AM**, Best SR, Metzler TJ, et al. Routine occupational stress and psychological distress in police. *Policing* 2002; **25**: 421–439.
7. **Huddleston L**, Stephens C, Paton D. An evaluation of traumatic and organizational experiences on the psychological health of New Zealand police recruits. *Work* 2007; **28**: 199–207.
8. **Johnson S**, Cooper C, Cartwright S, et al. The experience of work-related stress across occupations. *J Manag Psychol* 2005; **20**: 178-187.

- 1  
2  
3  
4  
5  
6  
7  
8  
9  
10  
11  
12  
13  
14  
15  
16  
17  
18  
19  
20  
21  
22  
23  
24  
25  
26  
27  
28  
29  
30  
31  
32  
33  
34  
35  
36  
37  
38  
39  
40  
41  
42  
43  
44  
45  
46  
47  
48  
49  
50  
51  
52  
53  
54  
55  
56  
57  
58  
59  
60
9. **Hart PM**, Wearing AJ, Headey B. Police stress and well-being: Integrating personality, coping and daily work experiences. *J Occup Organ Psychol* 1995; **68**: 133–165.
  10. **Velden PG van der**, Grievink L, Dusseldorp A, et al. *Health victims Enschede fireworks disaster* (In Dutch). Instituut voor Psychotrauma (IvP)/ Rijksinstituut voor Volksgezondheid en Milieu (RIVM), 2002.
  11. **Velden PG van der**, Burg S van der, Steinmetz CHD, et al. *Victim of bank robberies* (in Dutch). Bohn Stafleu Van Loghem, 1992.
  12. **Velden PG van der**, Herpers TMM. Aggression in a psychiatric hospital (in Dutch). *Gedrag & Gezondheid* 1994; **5**: 209-218.
  13. **Velden PG van der**, Kleber RJ, Oostrom I van. *StressMonitor manual* (in Dutch). Instituut voor Psychotrauma/S&N, 2000.
  14. **Rademaker AR**, van Zuiden M, Vermetten E, et al. Type D personality and the development of PTSD symptoms: a prospective study. *J Abnorm Psychol* 2011; **120** (2), 299-307.
  15. **Velden PG van der**, Christiaanse B, Kleber RJ, et al. The effects of disaster exposure and post-disaster critical incidents on intrusions, avoidance and health problems among firefighters: A comparative study. *Stress, Trauma Crisis: International J* 2006; **9**: 73–93.
  16. **Portengen MAF**. *Aggression and violence in social welfare* (in Dutch). Corvu / AMC Amsterdam, 1995.
  17. **Velden PG van der**. *Investigation of unsafe situations in supermarkets* (in Dutch). Instituut voor Psychotrauma, 1996.

- 1  
2  
3  
4  
5  
6  
7  
8  
9  
10  
11  
12  
13  
14  
15  
16  
17  
18  
19  
20  
21  
22  
23  
24  
25  
26  
27  
28  
29  
30  
31  
32  
33  
34  
35  
36  
37  
38  
39  
40  
41  
42  
43  
44  
45  
46  
47  
48  
49  
50  
51  
52  
53  
54  
55  
56  
57  
58  
59  
60
18. **Derogatis LR**. *SCL-90-R: administration, scoring and procedures manual-I for the R(evised) version*. Johns Hopkins University School of Medicine, Clinical Psychometrics Research Unit, 1977.
  19. **Arrindell WA**, Ettema JHM. *SCL-90-R Manual* (in Dutch). Swets & Zeitlinger/ Swets Test publishers, 1986 & 2003.
  20. **Kop N**, Euwema M, Schaufeli W. Burnout, job stress and violent behavior among Dutch police officers. *Work & Stress* 1999; **13**: 326-340.
  21. **Galatzer-Levy IR**, Madan A, Neylan TC, et al. Peritraumatic and trait dissociation differentiate police officers with resilient versus symptomatic trajectories of posttraumatic stress symptoms. *J Trauma Stress* 2011; **24**: 557-65.
  22. **Alexander DA**, Wells A. Reactions of police officers to body handling after a major disaster: a before and after comparison. *Br J Psychiatry* 1991; **159**: 547-555.
  23. **Hem E**, Berg AM, Ekeberg AO. Suicide in police--a critical review. *Suicide Life Threat Behav* 2001; **31**: 224-33.
  24. **Engelhard IM**, van den Hout MA, et al. Deployment-related stress and trauma in Dutch soldiers returning from Iraq. Prospective study. *Br J Psychiatry* 2007; **191**: 140-145.
  25. **Deering CG**, Glover SG, Ready D, et al. Unique patterns of comorbidity in posttraumatic stress disorder from different sources of trauma. *Compr Psychiatry* 1996; **37**: 336-346.
  26. **Blanchard EB**, Buckley TC, Hickling EJ, Taylor AE. Posttraumatic stress disorder and comorbid major depression: is the correlation an illusion? *J Anxiety Disord* 1998; **12**: 21-37.



- 1  
2  
3 27. **Rona RJ**, Jones M, Iversen A, et al. The impact of posttraumatic stress disorder on  
4  
5 impairment in the UK military at the time of the Iraq war. *J Psychiatry Res* 2009; **43**:  
6  
7 649-55.  
8  
9
- 10 28. **Neal LA**, Busutti W, Rollins JI, et al. convergent validity of measures of Post-Traumatic  
11  
12 Stress Disorder in a mixed military and civilian population. *J Trauma Stress* 1994; **7**:  
13  
14 447-455.  
15  
16
- 17 29. **Saunders BE**, Mandoki Arata C, Kilpatrick D. Development of a crime-related Post-  
18  
19 Traumatic Stress Disorder scale for women within the symptom checklist-90-revised.  
20  
21 *J Trauma Stress* 1990; **3**: 439-448.  
22  
23
- 24 30. **Weathers FW**, Litz BT, Keane TM, et al. The utility of the SCL-90-R for the diagnosis of  
25  
26 war-zone related Posttraumatic Stress Disorder. *J Trauma Stress* 1996; **9**: 111-128.  
27  
28
- 29 31. **Kessler RC**, Chiu WT, Demler O, Walters EE. Prevalence, severity, and comorbidity of  
30  
31 12-month DSM-IV disorders in the National Comorbidity Survey Replication. *Arch Gen*  
32  
33 *Psychiatry* 2005; **62**: 617-627.  
34  
35
- 36 32. **Vollebergh WAM**, Iedema J, Bijl RV, Graaf R de, Smit F, Ormel J. The structure and  
37  
38 stability of common mental disorders: the Nemesis-study. *Arch Gen Psychiatry* 2001;  
39  
40 **58**: 597-603.  
41  
42
- 43 33. **Graaf R de**, Have M ten, Dorsselaer S van. De psychische gezondheid van de  
44  
45 Nederlandse bevolking NEMESIS-2: Opzet en eerste resultaten [The mental health of  
46  
47 the Dutch population NEMESIS-2: Design and first results. In Dutch]. Utrecht, Trimbos.  
48  
49
- 50 34. **Sterud T**, Hem E, Ekeberg O, et al. Occupational stress and alcohol use: a study of two  
51  
52 nationwide samples of operational police and ambulance, personnel in Norway. *Stud*  
53  
54 *Alcohol Drugs* 2007; **68** (6):896-904.  
55  
56  
57  
58  
59  
60

1  
2  
3  
4  
5  
6  
7  
8  
9  
10  
11  
12  
13  
14  
15  
16  
17  
18  
19  
20  
21  
22  
23  
24  
25  
26  
27  
28  
29  
30  
31  
32  
33  
34  
35  
36  
37  
38  
39  
40  
41  
42  
43  
44  
45  
46  
47  
48  
49  
50  
51  
52  
53  
54  
55  
56  
57  
58  
59  
60

For peer review only

Table 1 Gender, age and education level of study groups<sup>1</sup>

|                                      | N    | Gender     |              | Age (years) |            |            | Education       |           |
|--------------------------------------|------|------------|--------------|-------------|------------|------------|-----------------|-----------|
|                                      |      | males<br>% | females<br>% | 18-30<br>%  | 31-45<br>% | 46-65<br>% | low-medium<br>% | high<br>% |
| 1 Police officers                    | 144  | 86.1       | 13.9         | 4.9         | 47.9       | 47.2       | 96.5            | 3.5       |
| 2 Police officers                    | 503  | 88.7       | 11.3         | 6.0         | 56.5       | 37.6       | 91.7            | 8.3       |
| 3 Bank employees, not victim robbery | 1113 | 34.1       | 65.9         | 48.7        | 38.3       | 13.0       | 81.0            | 19.0      |
| 4 Bank employees, victim robbery     | 148  | 47.3       | 52.7         | 37.8        | 44.6       | 17.6       | 79.1            | 20.9      |
| 5 Psychiatric hospital employees     | 219  | 37.9       | 62.1         | 41.6        | 47.5       | 11.0       | 61.6            | 38.4      |
| 6 Trainees AT                        | 710  | 68.2       | 31.8         | 29.0        | 57.9       | 13.1       | 33.8            | 66.2      |
| 7 Soldiers, not deployed before      | 278  | 87.8       | 12.2         | 81.3        | 14.7       | 4.0        | 88.8            | 11.2      |
| 8 Soldiers, deployed before          | 236  | 94.5       | 5.5          | 43.6        | 43.2       | 13.1       | 85.2            | 14.8      |
| 9 Firefighters                       | 123  | 96.7       | 3.3          | 17.1        | 39.0       | 43.9       | 94.3            | 5.7       |
| 10 Social welfare                    | 76   | 40.8       | 59.2         | 15.8        | 50.0       | 34.2       | 42.1            | 57.9      |
| 11 Supermarkets                      | 335  | 56.1       | 43.9         | 100         | -          | -          | 86.6            | 13.4      |
| Total                                | 3885 | 61.5       | 38.5         | 41.9        | 40.9       | 17.2       | 74.1            | 25.9      |

<sup>1</sup> Demographic characteristics of respondents with complete data

Table 2 Differences in prevalence of severe anxiety, depression and/or hostility symptoms (scores 80<sup>th</sup> centile) between study groups (N=3885).

|                                        | Severe Anxiety Symptoms |      |      |               |     |       |               |     | Severe Depression Symptoms |      |              |              |     |       |               |     |
|----------------------------------------|-------------------------|------|------|---------------|-----|-------|---------------|-----|----------------------------|------|--------------|--------------|-----|-------|---------------|-----|
|                                        | Symptoms                |      | Adj. |               |     | Adj.  |               |     | Symptoms                   |      | Adj.         |              |     | Adj.  |               |     |
|                                        | N                       | %    | OR   | 95 C.I.       | p   | OR    | 95 C.I.       | p   | N                          | %    | OR           | 95 C.I.      | p   | OR    | 95 C.I.       | p   |
| <b>Groups</b>                          |                         |      |      |               |     |       |               |     |                            |      |              |              |     |       |               |     |
| Police officers 1 (Ref.)               | 9                       | 6.2  | 1    |               |     |       |               |     |                            |      |              |              |     |       |               |     |
| Police officers 2 (Ref. second column) | 17                      | 3.4  | 0.54 | 0.24 to 1.24  | .15 | 1     |               | 26  | 5.2                        | 0.41 | 0.22 to 0.79 | .01          |     |       |               |     |
| Bank empl., not victim robbery         | 80                      | 7.2  | 1.52 | 0.73 to 3.17  | .26 | 2.82  | 1.61 to 4.92  | .00 | 134                        | 12.0 | 1.26         | 0.72 to 2.20 | .41 | 3.10  | 1.97 to 4.89  | .00 |
| Bank empl., victim robbery             | 32                      | 21.6 | 5.24 | 2.37 to 11.59 | .00 | 9.71  | 5.14 to 18.35 | .00 | 31                         | 20.9 | 2.35         | 1.22 to 4.52 | .01 | 5.76  | 3.25 to 10.19 | .00 |
| Psychiatric hospital empl.             | 22                      | 10.0 | 2.32 | 1.01 to 5.30  | .05 | 4.31  | 2.19 to 8.48  | .00 | 36                         | 16.4 | 1.82         | 0.96 to 3.46 | .07 | 4.50  | 2.59 to 7.82  | .00 |
| Trainees AT                            | 161                     | 22.7 | 5.98 | 2.89 to 12.35 | .00 | 11.27 | 6.53 to 19.44 | .00 | 257                        | 36.2 | 4.83         | 2.77 to 8.44 | .00 | 11.98 | 7.62 to 18.82 | .00 |
| Soldiers, not deployed before          | 17                      | 6.1  | 1.02 | 0.43 to 2.42  | .97 | 1.91  | 0.93 to 3.93  | .08 | 20                         | 7.2  | 0.60         | 0.29 to 1.21 | .15 | 1.47  | 0.78 to 2.75  | .23 |
| Soldiers, deployed before              | 12                      | 5.1  | 0.85 | 0.34 to 2.09  | .72 | 1.58  | 0.74 to 3.41  | .24 | 18                         | 7.6  | 0.63         | 0.31 to 1.29 | .21 | 1.56  | 0.83 to 2.92  | .17 |
| Firefighters                           | 5                       | 4.1  | 0.62 | 0.20 to 1.89  | .40 | 1.14  | 0.41 to 3.14  | .81 | 16                         | 13.0 | 1.08         | 0.52 to 2.24 | .84 | 2.60  | 1.35 to 5.03  | .00 |
| Social welfare                         | 13                      | 17.1 | 4.32 | 1.72 to 10.88 | .00 | 8.04  | 3.64 to 17.77 | .00 | 17                         | 22.4 | 2.56         | 1.20 to 5.47 | .02 | 6.25  | 3.14 to 12.45 | .00 |
| <b>Education</b>                       |                         |      |      |               |     |       |               |     |                            |      |              |              |     |       |               |     |
| Low-medium (Ref.)                      | 231                     | 8.9  | 1    |               |     | 1     |               |     | 336                        | 13.0 | 1            |              |     | 1     |               |     |
| High                                   | 137                     | 14.3 | 0.77 | 0.59 to 1.01  | .06 | 0.75  | 0.57 to 0.98  | .03 | 236                        | 24.6 | 1.00         | 0.80 to 1.26 | .99 | 0.99  | 0.79 to 1.24  | .90 |
| <b>Age</b>                             |                         |      |      |               |     |       |               |     |                            |      |              |              |     |       |               |     |
| 18-30 (Ref.)                           | 127                     | 9.8  | 1    |               |     | 1     |               |     | 195                        | 15.1 | 1            |              |     | 1     |               |     |
| 31-35                                  | 168                     | 10.6 | 0.85 | 0.60 to 1.21  | .36 | 0.83  | 0.58 to 1.18  | .29 | 266                        | 16.7 | 0.86         | 0.64 to 1.15 | .31 | 0.81  | 0.60 to 1.10  | .17 |
| 46-65                                  | 73                      | 10.9 | 0.73 | 0.54 to 1.00  | .05 | 0.72  | 0.52 to 0.99  | .04 | 111                        | 16.6 | 0.76         | 0.58 to 0.99 | .04 | 0.72  | 0.55 to 0.94  | .02 |
| <b>Gender</b>                          |                         |      |      |               |     |       |               |     |                            |      |              |              |     |       |               |     |
| Males (Ref.)                           | 240                     | 10.9 | 1    |               |     | 1     |               |     | 371                        | 16.8 | 1            |              |     | 1     |               |     |
| Females                                | 128                     | 9.5  | 0.70 | 0.53 to 0.91  | .01 | 0.71  | 0.54 to 0.93  | .01 | 201                        | 14.9 | 0.72         | 0.58 to 0.90 | .00 | 0.72  | 0.58 to 0.91  | .01 |

Table 2 Continued

|                                        | Severe Hostility Symptoms |      |      |              |     |      |               |     |          | Severe Symptoms Composite Variable |      |              |              |      |               |     |  |  |
|----------------------------------------|---------------------------|------|------|--------------|-----|------|---------------|-----|----------|------------------------------------|------|--------------|--------------|------|---------------|-----|--|--|
|                                        | Symptoms                  |      | Adj. |              |     | Adj. |               |     | Symptoms |                                    | Adj. |              |              | Adj. |               |     |  |  |
|                                        | N                         | %    | OR   | 95 C.I.      | p   | OR   | 95 C.I.       | p   | N        | %                                  | OR   | 95 C.I.      | p            | OR   | 95 C.I.       | p   |  |  |
| <b>Groups</b>                          |                           |      |      |              |     |      |               |     |          |                                    |      |              |              |      |               |     |  |  |
| Police officers 1 (Ref.)               | 16                        | 11.1 | 1    |              |     |      |               |     |          | 26                                 | 18.1 | 1            |              |      |               |     |  |  |
| Police officers 2 (Ref. second column) | 33                        | 6.6  | 0.57 | 0.30 to 1.06 | .08 | 1    |               |     |          | 49                                 | 9.7  | 0.49         | 0.29 to 0.83 | .01  | 1             |     |  |  |
| Bank empl., not victim robbery         | 150                       | 13.5 | 1.68 | 0.96 to 2.96 | .07 | 2.97 | 1.96 to 4.50  | .00 | 236      | 21.2                               | 1.49 | 0.94 to 2.38 | .09          | 3.05 | 2.15 to 4.33  | .00 |  |  |
| Bank empl., victim robbery             | 30                        | 20.3 | 2.62 | 1.34 to 5.10 | .00 | 4.62 | 2.68 to 7.98  | .00 | 49       | 33.1                               | 2.66 | 1.52 to 4.64 | .00          | 5.43 | 3.42 to 8.63  | .00 |  |  |
| Psychiatric hospital empl.             | 29                        | 13.2 | 1.74 | 0.89 to 3.40 | .10 | 3.07 | 1.78 to 5.31  | .00 | 52       | 23.7                               | 1.78 | 1.03 to 3.08 | .04          | 3.66 | 2.34 to 5.72  | .00 |  |  |
| Trainees AT                            | 224                       | 31.5 | 5.06 | 2.86 to 8.94 | .00 | 8.96 | 5.90 to 13.59 | .00 | 328      | 46.2                               | 4.66 | 2.90 to 7.49 | .00          | 9.59 | 6.71 to 13.71 | .00 |  |  |
| Soldiers, not deployed before          | 56                        | 20.1 | 1.83 | 0.98 to 3.42 | .06 | 3.25 | 1.99 to 5.30  | .00 | 66       | 23.7                               | 1.26 | 0.74 to 2.14 | .40          | 2.59 | 1.68 to 3.99  | .00 |  |  |
| Soldier, deployed before               | 44                        | 18.6 | 1.73 | 0.93 to 3.25 | .08 | 3.07 | 1.87 to 5.02  | .00 | 52       | 22.0                               | 1.20 | 0.70 to 2.05 | .50          | 2.47 | 1.60 to 3.81  | .00 |  |  |
| Firefighters                           | 17                        | 13.8 | 1.20 | 0.58 to 2.49 | .63 | 2.13 | 1.14 to 3.97  | .02 | 25       | 20.3                               | 1.09 | 0.59 to 2.01 | .79          | 2.21 | 1.30 to 3.75  | .00 |  |  |
| Social welfare                         | 17                        | 22.4 | 3.62 | 1.68 to 7.82 | .00 | 6.42 | 3.30 to 12.51 | .00 | 21       | 27.6                               | 2.31 | 1.17 to 4.53 | .02          | 4.71 | 2.58 to 8.59  | .00 |  |  |
| <b>Education</b>                       |                           |      |      |              |     |      |               |     |          |                                    |      |              |              |      |               |     |  |  |
| Low-medium (Ref.)                      | 419                       | 16.2 | 1    |              |     | 1    |               |     | 591      | 22.8                               | 1    |              |              | 1    |               |     |  |  |
| High                                   | 197                       | 20.5 | 0.70 | 0.55 to 0.88 | .00 | 0.69 | 0.55 to 0.87  | .00 | 313      | 32.6                               | 0.85 | 0.69 to 1.03 | .10          | 0.84 | 0.69 to 1.02  | .08 |  |  |
| <b>Age</b>                             |                           |      |      |              |     |      |               |     |          |                                    |      |              |              |      |               |     |  |  |
| 18-30 (Ref.)                           | 234                       | 18.1 | 1    |              |     | 1    |               |     | 346      | 26.7                               | 1    |              |              | 1    |               |     |  |  |
| 31-35                                  | 276                       | 17.4 | 1.12 | 0.84 to 1.49 | .46 | 1.13 | 0.84 to 1.51  | .43 | 403      | 25.4                               | 1.11 | 0.87 to 1.44 | .40          | 1.08 | 0.84 to 1.40  | .55 |  |  |
| 46-65                                  | 106                       | 15.9 | 0.92 | 0.71 to 1.20 | .55 | 0.94 | 0.72 to 1.23  | .65 | 155      | 23.2                               | 0.90 | 0.71 to 1.13 | .35          | 0.87 | 0.69 to 1.10  | .25 |  |  |
| <b>Gender</b>                          |                           |      |      |              |     |      |               |     |          |                                    |      |              |              |      |               |     |  |  |
| Males (Ref.)                           | 433                       | 19.7 | 1    |              |     | 1    |               |     | 698      | 27.1                               | 1    |              |              | 1    |               |     |  |  |
| Females                                | 183                       | 13.6 | 0.55 | 0.44 to 0.68 | .00 | 0.55 | 0.44 to 0.69  | .00 | 306      | 22.7                               | 0.63 | 0.52 to 0.77 | .00          | 0.64 | 0.53 to 0.78  | .00 |  |  |

Adj. OR = Odds ratio adjusted for all study variables. 95 CI = 95 confidence interval. Ref. =Reference group  
 N.a = Not applicable because the prevalence of very severe anxiety symptoms among firefighter is zero.  
 1 Anxiety and/or depression and/or hostility.

Table 3 Differences in prevalence of very severe anxiety, depression and/or hostility symptoms (scores 95<sup>th</sup> centile) between study groups (N=3885).

|                                        | Very Severe Anxiety Symptoms |     |      |               |     |      |               |     | Very Severe Depression Symptoms |      |              |               |      |              |               |     |
|----------------------------------------|------------------------------|-----|------|---------------|-----|------|---------------|-----|---------------------------------|------|--------------|---------------|------|--------------|---------------|-----|
|                                        | Symptoms                     |     | Adj. |               |     | Adj. |               |     | Symptoms                        |      | Adj.         |               |      | Adj.         |               |     |
|                                        | N                            | %   | OR   | 95 C.I.       | p   | OR   | 95 C.I.       | p   | N                               | %    | OR           | 95 C.I.       | p    | OR           | 95 C.I.       | p   |
| <b>Groups</b>                          |                              |     |      |               |     |      |               |     |                                 |      |              |               |      |              |               |     |
| Police officers 1 (Ref.)               | 2                            | 1.4 | 1    |               |     |      |               | 2   | 1.4                             | 1    |              |               |      |              |               |     |
| Police officers 2 (Ref. second column) | 3                            | 0.6 | 0.41 | 0.07 to 2.50  | .34 | 1    |               | 6   | 1.2                             | 0.86 | 0.17 to 4.32 | .86           | 1    |              |               |     |
| Bank empl., not victim robbery         | 9                            | 0.8 | 0.73 | 0.15 to 3.56  | .69 | 1.74 | 0.45 to 6.78  | .42 | 30                              | 2.7  | 2.09         | 0.48 to 9.03  | .33  | 2.41         | 0.96 to 6.02  | .06 |
| Bank empl., victim robbery             | 7                            | 4.7 | 4.08 | 0.81 to 20.62 | .09 | 9.81 | 2.44 to 39.50 | .00 | 13                              | 8.8  | 7.22         | 1.58 to 33.11 | .01  | 8.35         | 3.06 to 22.80 | .00 |
| Psychiatric hospital empl.             | 1                            | 0.5 | 0.38 | 0.03 to 4.41  | .44 | 0.91 | 0.09 to 9.12  | .94 | 13                              | 5.9  | 4.92         | 1.07 to 22.71 | .04  | 5.68         | 2.06 to 15.64 | .00 |
| Trainees AT                            | 32                           | 4.5 | 3.20 | 0.70 to 14.53 | .13 | 7.67 | 2.18 to 27.04 | .00 | 69                              | 9.7  | 8.39         | 1.97 to 35.67 | .00  | 9.70         | 4.02 to 23.44 | .00 |
| Soldiers, not deployed before          | 2                            | 0.7 | 0.54 | 0.07 to 4.14  | .55 | 1.30 | 0.20 to 8.38  | .78 | 1                               | 0.4  | 0.22         | 0.02 to 2.52  | .22  | 0.26         | 0.03 to 2.19  | .21 |
| Soldiers, deployed before              | 0                            | 0.0 | N.A  |               |     |      |               | 2   | 0.8                             | 0.56 | 0.08 to 4.09 | .57           | 0.65 | 0.13 to 3.30 | .61           |     |
| Firefighters                           | 0                            | 0.0 | N.A  |               |     |      |               | 2   | 1.6                             | 1.12 | 0.15 to 8.06 | .91           | 1.30 | 0.26 to 6.52 | .75           |     |
| Social welfare                         | 1                            | 1.3 | 1.04 | 0.09 to 12.24 | .97 | 2.50 | 0.25 to 25.41 | .44 | 4                               | 5.3  | 4.63         | 0.81 to 26.49 | .08  | 5.34         | 1.43 to 19.96 | .01 |
| <b>Education</b>                       |                              |     |      |               |     |      |               |     |                                 |      |              |               |      |              |               |     |
| Low-medium (Ref.)                      | 29                           | 1.1 | 1    |               |     |      |               | 82  | 3.2                             | 1    |              |               |      |              |               |     |
| High                                   | 28                           | 2.9 | 1.19 | 0.64 to 2.21  | .58 | 1.20 | 0.64 to 2.24  | .56 | 60                              | 6.2  | 0.87         | 0.59 to 1.30  | .50  | 0.87         | 0.59 to 1.30  | .51 |
| <b>Age</b>                             |                              |     |      |               |     |      |               |     |                                 |      |              |               |      |              |               |     |
| 18-30 (Ref.)                           | 16                           | 1.2 | 1    |               |     |      |               | 52  | 4.0                             | 1    |              |               |      |              |               |     |
| 31-35                                  | 32                           | 2.0 | 0.98 | 0.40 to 2.42  | .96 | 0.99 | 0.39 to 2.49  | .98 | 67                              | 4.2  | 1.18         | 0.68 to 2.04  | .56  | 1.18         | 0.68 to 2.05  | .57 |
| 46-65                                  | 9                            | 1.3 | 1.15 | 0.53 to 2.49  | .72 | 1.16 | 0.52 to 2.59  | .71 | 23                              | 3.4  | 0.93         | 0.56 to 1.53  | .76  | 0.92         | 0.56 to 1.54  | .76 |
| <b>Gender</b>                          |                              |     |      |               |     |      |               |     |                                 |      |              |               |      |              |               |     |
| Males (Ref.)                           | 41                           | 1.9 | 1    |               |     |      |               | 86  | 3.9                             | 1    |              |               |      |              |               |     |
| Females                                | 16                           | 1.2 | 0.61 | 0.32 to 1.17  | .14 | 0.62 | 0.32 to 1.19  | .15 | 56                              | 4.2  | 0.79         | 0.53 to 1.18  | .25  | 0.80         | 0.54 to 1.19  | .27 |

Table 3 Continued

|                                        | Very Severe Hostility Symptoms |     |      |               |     |       |               |     | Very Severe Symptoms Composite Variable |      |              |               |     |       |               |     |
|----------------------------------------|--------------------------------|-----|------|---------------|-----|-------|---------------|-----|-----------------------------------------|------|--------------|---------------|-----|-------|---------------|-----|
|                                        | Symptoms                       |     | Adj. |               |     | Adj.  |               |     | Symptoms                                |      | Adj.         |               |     | Adj.  |               |     |
|                                        | N                              | %   | OR   | 95 C.I.       | p   | OR    | 95 C.I.       | p   | N                                       | %    | OR           | 95 C.I.       | p   | OR    | 95 C.I.       | p   |
| <b>Groups</b>                          |                                |     |      |               |     |       |               |     |                                         |      |              |               |     |       |               |     |
| Police officers 1 (Ref.)               | 2                              | 1.4 | 1    |               |     |       |               |     |                                         |      |              |               |     |       |               |     |
| Police officers 1 (Ref. second column) | 5                              | 1.0 | 0.73 | 0.14 to 3.79  | .70 | 1     |               | 7   | 1.4                                     | 0.67 | 0.17 to 2.62 | .56           | 1   |       |               |     |
| Bank empl., not victim robbery         | 28                             | 2.5 | 1.67 | 0.38 to 7.31  | .50 | 2.25  | 0.83 to 6.12  | .11 | 51                                      | 4.6  | 2.31         | 0.70 to 7.64  | .17 | 3.42  | 1.50 to 7.78  | .00 |
| Bank empl., victim robbery             | 9                              | 6.1 | 4.41 | 0.92 to 21.20 | .06 | 5.97  | 1.92 to 18.54 | .00 | 19                                      | 12.8 | 7.16         | 2.04 to 25.10 | .00 | 10.63 | 4.31 to 26.21 | .00 |
| Psychiatric hospital empl.             | 7                              | 3.2 | 2.40 | 0.48 to 12.07 | .29 | 3.23  | 0.98 to 10.65 | .05 | 16                                      | 7.3  | 4.02         | 1.13 to 14.36 | .03 | 5.95  | 2.36 to 15.05 | .00 |
| Trainees AT                            | 44                             | 6.2 | 5.71 | 1.32 to 24.72 | .02 | 7.71  | 2.90 to 20.49 | .00 | 96                                      | 13.5 | 8.38         | 2.55 to 27.51 | .00 | 12.43 | 5.55 to 27.83 | .00 |
| Soldiers, not deployed before          | 7                              | 2.5 | 1.26 | 0.25 to 6.42  | .78 | 1.70  | 0.51 to 5.72  | .39 | 8                                       | 2.9  | 1.12         | 0.29 to 4.43  | .87 | 1.67  | 0.58 to 4.82  | .34 |
| Soldiers, deployed before              | 4                              | 1.7 | 1.02 | 0.18 to 5.75  | .99 | 1.38  | 0.36 to 5.30  | .64 | 6                                       | 2.5  | 1.10         | 0.27 to 4.54  | .89 | 1.64  | 0.54 to 5.00  | .38 |
| Firefighters                           | 2                              | 1.6 | 1.07 | 0.15 to 7.76  | .94 | 1.49  | 0.28 to 7.78  | .64 | 3                                       | 2.4  | 1.11         | 0.22 to 5.59  | .90 | 1.66  | 0.42 to 6.51  | .47 |
| Social welfare                         | 7                              | 9.2 | 9.20 | 1.81 to 46.91 | .01 | 12.57 | 3.73 to 42.40 | .00 | 9                                       | 11.8 | 7.68         | 1.97 to 29.89 | .00 | 11.41 | 4.01 to 32.45 | .00 |
| <b>Education</b>                       |                                |     |      |               |     |       |               |     |                                         |      |              |               |     |       |               |     |
| Low-medium (Ref.)                      | 78                             | 3.0 | 1    |               |     | 1     |               |     | 134                                     | 5.2  | 1            |               |     |       |               |     |
| High                                   | 37                             | 3.9 | 0.62 | 0.39 to 0.99  | .05 | 0.62  | 0.39 to 0.99  | .05 | 84                                      | 8.7  | 0.79         | 0.56 to 1.10  | .16 | 0.79  | 0.56 to 1.10  | .16 |
| <b>Age</b>                             |                                |     |      |               |     |       |               |     |                                         |      |              |               |     |       |               |     |
| 18-30 (Ref.)                           | 53                             | 4.1 | 1    |               |     | 1     |               |     | 88                                      | 6.8  | 1            |               |     |       |               |     |
| 31-35                                  | 44                             | 2.8 | 1.56 | 0.85 to 2.85  | .15 | 1.67  | 0.89 to 3.11  | .11 | 96                                      | 6.0  | 1.28         | 0.82 to 2.02  | .28 | 1.31  | 0.83 to 2.06  | .25 |
| 46-65                                  | 18                             | 2.7 | 0.87 | 0.49 to 1.54  | .63 | 0.95  | 0.52 to 1.72  | .86 | 34                                      | 5.1  | 0.92         | 0.60 to 1.39  | .69 | 0.94  | 0.61 to 1.44  | .77 |
| <b>Gender</b>                          |                                |     |      |               |     |       |               |     |                                         |      |              |               |     |       |               |     |
| Males (Ref.)                           | 66                             | 3.0 | 1    |               |     | 1     |               |     | 130                                     | 5.9  | 1            |               |     | 1     |               |     |
| Females                                | 49                             | 3.6 | 0.87 | 0.55 to 1.35  | .53 | 0.88  | 0.56 to 1.37  | .56 | 88                                      | 6.5  | 0.81         | 0.58 to 1.12  | .20 | 0.81  | 0.59 to 1.13  | .22 |

Adj. OR = Odds ratio adjusted for all study variables. 95 CI = 95 confidence interval. Ref. =Reference group

N.a = Not applicable because the prevalence of very severe anxiety symptoms among firefighter is zero.

<sup>1</sup> Anxiety and/or depression and/or hostility.

## Appendix A Bivariate associations between predictors and dependent variables

|                                        | Severe Anxiety symptoms |     | Severe Depression symptoms |     | Severe hostility symptoms |     | Severe Symptoms Composite |     |
|----------------------------------------|-------------------------|-----|----------------------------|-----|---------------------------|-----|---------------------------|-----|
|                                        | OR                      | p   | OR                         | p   | OR                        | p   | OR                        | p   |
| Groups                                 |                         |     |                            |     |                           |     |                           |     |
| Police officers 1 (Ref.)               | 1                       |     |                            |     | 1                         |     |                           |     |
| Police officers 2 (Ref. second column) | 0.53                    | .13 | 1                          |     | 0.41                      | .01 | 1                         |     |
| Bank employees, not victim robbery     | 1.16                    | .68 | 2.21                       | .00 | 1.02                      | .94 | 2.51                      | .00 |
| Bank employees, victim robbery         | 4.14                    | .00 | 7.89                       | .00 | 1.98                      | .04 | 4.86                      | .00 |
| Psychiatric hospital employees         | 1.68                    | .21 | 3.19                       | .00 | 1.47                      | .22 | 3.61                      | .00 |
| Trainees AT                            | 4.40                    | .00 | 8.38                       | .00 | 4.24                      | .00 | 10.41                     | .00 |
| Soldiers, not deployed before          | 0.98                    | .96 | 1.86                       | .08 | 0.58                      | .12 | 1.42                      | .25 |
| Soldiers, deployed before              | 0.80                    | .63 | 1.53                       | .27 | 0.62                      | .18 | 1.52                      | .19 |
| Firefighters                           | 0.64                    | .43 | 1.21                       | .71 | 1.12                      | .77 | 2.74                      | .00 |
| Social welfare                         | 3.10                    | .01 | 5.90                       | .00 | 2.15                      | .04 | 5.29                      | .00 |
| Education                              |                         |     |                            |     |                           |     |                           |     |
| Low-medium                             | 1                       |     |                            |     | 1                         |     |                           |     |
| High                                   | 1.70                    | .00 | 1.63                       | .00 | 2.18                      | .00 | 2.15                      | .00 |
| Age                                    |                         |     |                            |     |                           |     |                           |     |
| 18-30                                  | 1                       |     |                            |     | 1                         |     |                           |     |
| 31-35                                  | 0.89                    | .43 | 0.83                       | .25 | 0.89                      | .36 | 0.83                      | .16 |
| 46-65                                  | 0.96                    | .79 | 0.93                       | .63 | 1.01                      | .95 | 0.96                      | .73 |
| Gender                                 |                         |     |                            |     |                           |     |                           |     |
| Males                                  | 1                       |     |                            |     | 1                         |     |                           |     |
| Females                                | 0.86                    | .19 | 0.85                       | .18 | 0.87                      | .13 | 0.85                      | .10 |



Appendix A Continued

|                                        | Very Severe Anxiety symptoms |      |      |      | Very Severe Depression symptoms |     |      |     | Very Severe hostility symptoms |     |       |     | Very Severe symptoms Composite |     |       |     |
|----------------------------------------|------------------------------|------|------|------|---------------------------------|-----|------|-----|--------------------------------|-----|-------|-----|--------------------------------|-----|-------|-----|
|                                        | OR                           | p    | OR   | p    | OR                              | p   | OR   | p   | OR                             | p   | OR    | p   | OR                             | p   | OR    | p   |
| Groups                                 |                              |      |      |      |                                 |     |      |     |                                |     |       |     |                                |     |       |     |
| Police officers 1 (Ref.)               | 1                            |      |      |      | 1                               |     |      |     | 1                              |     |       |     | 1                              |     |       |     |
| Police officers 2 (Ref. second column) | 0.43                         | .35  | 1    |      | 0.86                            | .85 | 1    |     | 0.71                           | .69 | 1     |     | 0.66                           | .56 | 1     |     |
| Bank employees, not victim robbery     | 0.58                         | .49  | 1.36 | .65  | 1.97                            | .36 | 2.30 | .07 | 1.83                           | .41 | 2.57  | .05 | 2.26                           | .18 | 3.40  | .00 |
| Bank employees, victim robbery         | 3.53                         | .12  | 8.27 | .00  | 6.84                            | .01 | 7.98 | .00 | 4.60                           | .05 | 6.45  | .00 | 6.92                           | .00 | 10.44 | .00 |
| Psychiatric hospital employees         | 0.33                         | .36  | 0.77 | .82  | 4.48                            | .05 | 5.23 | .00 | 2.34                           | .29 | 3.29  | .04 | 3.70                           | .04 | 5.59  | .00 |
| Trainees AT                            | 3.35                         | .10  | 7.87 | .00  | 7.64                            | .01 | 8.92 | .00 | 4.69                           | .03 | 6.58  | .00 | 7.35                           | .00 | 11.08 | .00 |
| Soldiers, not deployed before          | 0.51                         | .51  | 1.21 | .84  | 0.26                            | .27 | 0.30 | .27 | 1.83                           | .45 | 2.57  | .11 | 1.39                           | .63 | 2.10  | .16 |
| Soldiers, deployed before              | 0.00                         | 1.00 | 0.00 | 1.00 | 0.61                            | .62 | 0.71 | .67 | 1.22                           | .82 | 1.72  | .42 | 1.23                           | .78 | 1.85  | .27 |
| Firefighters                           | 0.00                         | 1.00 | 0.00 | 1.00 | 1.17                            | .87 | 1.37 | .70 | 1.17                           | .87 | 1.65  | .55 | 1.18                           | .85 | 1.77  | .41 |
| Social welfare                         | 0.95                         | .97  | 2.22 | .49  | 3.94                            | .12 | 4.60 | .02 | 7.20                           | .02 | 10.10 | .00 | 6.31                           | .01 | 9.52  | .00 |
| Education                              |                              |      |      |      |                                 |     |      |     |                                |     |       |     |                                |     |       |     |
| Low-medium                             | 1                            |      |      |      | 1                               |     |      |     | 1                              |     |       |     | 1                              |     |       |     |
| High                                   | 2.65                         | .00  | 2.71 | .00  | 2.04                            | .00 | 1.98 | .00 | 1.29                           | .21 | 1.26  | .26 | 1.76                           | .00 | 1.71  | .00 |
| Age                                    |                              |      |      |      |                                 |     |      |     |                                |     |       |     |                                |     |       |     |
| 18-30                                  | 1                            |      |      |      | 1                               |     |      |     | 1                              |     |       |     | 1                              |     |       |     |
| 31-35                                  | 0.92                         | .83  | 0.93 | .87  | 1.17                            | .53 | 1.10 | .70 | 1.54                           | .12 | 1.57  | .12 | 1.36                           | .14 | 1.30  | .22 |
| 46-65                                  | 1.50                         | .28  | 1.54 | .28  | 1.23                            | .40 | 1.19 | .49 | 1.03                           | .93 | 1.09  | .78 | 1.20                           | .38 | 1.18  | .43 |
| Gender                                 |                              |      |      |      |                                 |     |      |     |                                |     |       |     |                                |     |       |     |
| Males                                  | 1                            |      |      |      | 1                               |     |      |     | 1                              |     |       |     | 1                              |     |       |     |
| Females                                | 0.63                         | .13  | 0.64 | .13  | 1.07                            | .71 | 1.05 | .80 | 1.22                           | .30 | 1.21  | .33 | 1.12                           | .45 | 1.09  | .54 |

OR = Odds ratio.  
Ref. =Reference group

For peer review only

1  
2  
3  
4  
5  
6  
7  
8  
9  
10  
11  
12  
13  
14  
15  
16  
17  
18  
19  
20  
21  
22  
23  
24  
25  
26  
27  
28  
29  
30  
31  
32  
33  
34  
35  
36  
37  
38  
39  
40  
41  
42  
43  
44  
45  
46  
47  
48  
49
